# Supplementary material for: Nickel ferrite nanoparticles–hydrogen peroxide: a green catalyst-oxidant combination in chemoselective oxidation of thiols to disulfides and sulfides to sulfoxides
Source: Royal Society of Chemistry journal article supplement (doi:10.1039/c4ra04095c), 2014-07-23
Supplement: c4ra04095c1.pdf [file c4ra04095c1.pdf]

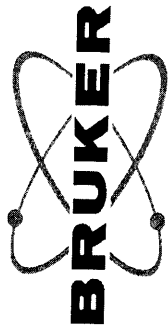

Current Data Parameters  
NAME NAK  
EXPNO 250  
PROCNO 1

F2 - Acquisition Parameters  
Date\_ 20110327  
Time 22.21  
INSTRUM spect  
PROBHD 5 mm BBO BB-1H  
PULPROG zg30  
TD 65536  
SOLVENT CDCl3  
NS 16  
DS 2  
SWH 6188.119 Hz  
FIDRES 0.094423 Hz  
AQ 5.2953587 sec  
RG 144  
DW 80.800 usec  
DE 6.00 usec  
TE 300.0 K  
D1 1.00000000 sec  
TD0 1

==== CHANNEL f1 =====  
NUC1 1H  
P1 11.00 usec  
PL1 C.00 dB  
SFO1 300.1318534 MHz

F2 - Processing parameters  
SI 32768  
SF 300.1300000 MHz  
WDW EM  
SSB 0  
LB C.30 Hz  
GB 0  
PC 1.00

Oxi\_4-bromothioanisole

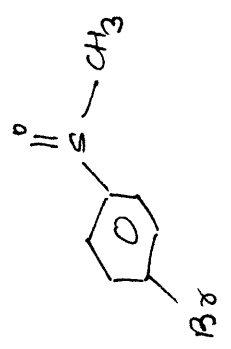

2.697  
2.689

7.668  
7.662  
7.640  
7.632  
7.518  
7.511  
7.489  
7.482  
7.268

7.668  
7.662  
7.640  
7.632  
7.518  
7.511  
7.489  
7.482

7.7 7.6 7.5 ppm

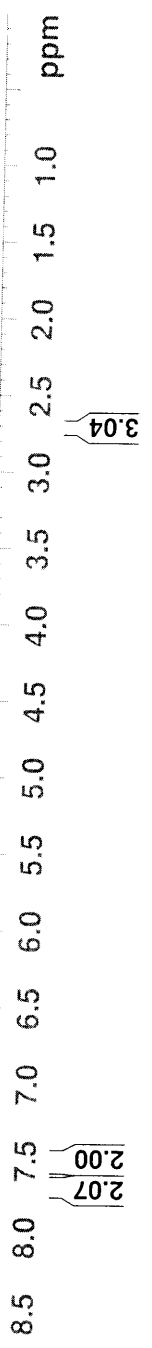

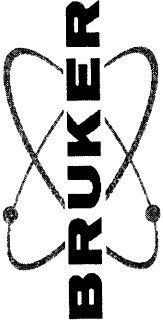

Current Data Parameters  
NAME MAK  
EXPNO 262  
PROCNO 1

F2 - Acquisition Parameters  
Date\_ 20110327  
Time 23.46  
INSTRUM spect  
PROBHD 5 mm BBO BB-1H  
PULPROG zgpg30  
TD 65536  
SOLVENT CDCl3  
NS 941  
DS 4  
SWH 18028.846 Hz  
FIDRES 0.275098 Hz  
AQ 1.8175818 sec  
RG 32800  
DW 27.733 usec  
DE 6.00 usec  
TE 300.0 K  
D1 2.00000000 sec  
d11 0.03000000 sec  
DELTA 1.89999998 sec  
TD0 1

==== CHANNEL f1 =====  
NUC1 13C  
P1 9.25 usec  
PL1 -1.00 dB  
SFO1 75.4752953 MHz

==== CHANNEL f2 =====  
CPDPRG2 waltz16  
NUC2 1H  
PCPD2 80.00 usec  
PL12 17.00 dB  
PL13 17.00 dB  
PL2 0.00 dB  
SFO2 300.1312005 MHz

F2 - Processing parameters  
SI 32768  
SF 75.4677490 MHz  
WDW EM  
SSB 0  
LB 1.00 Hz  
GB 0  
PC 1.40

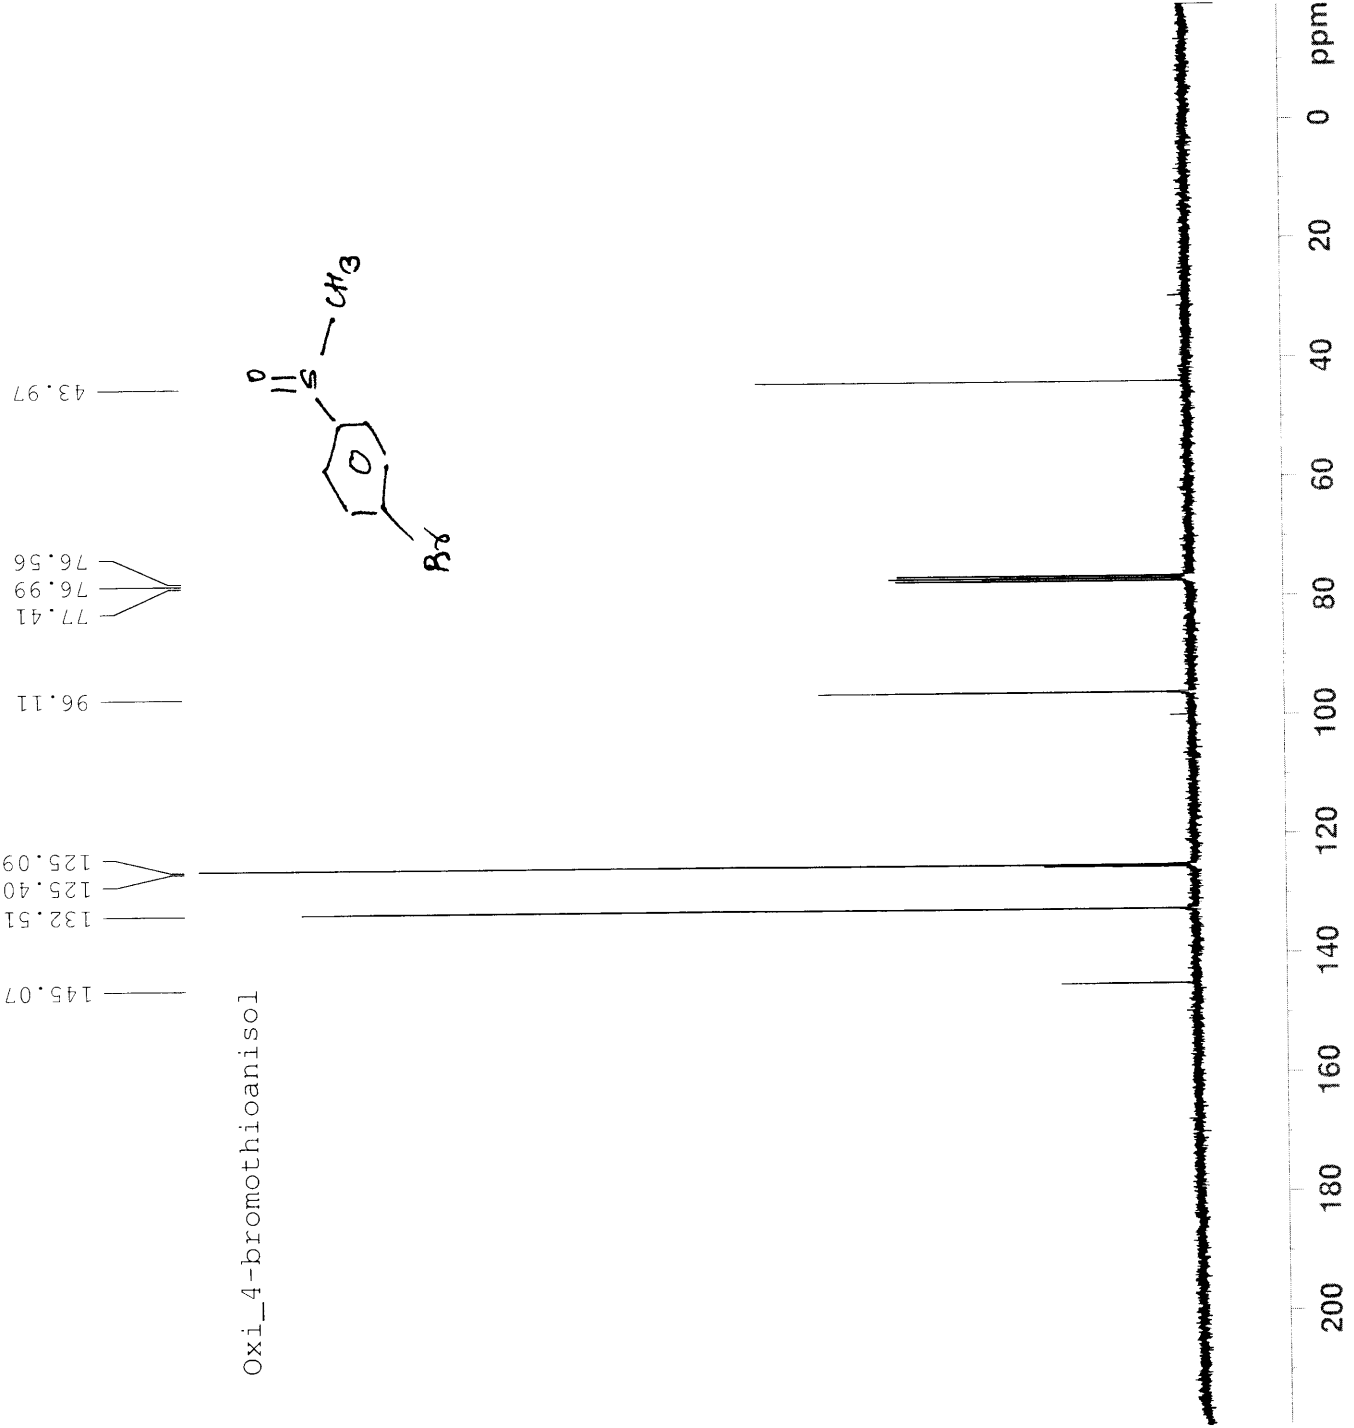

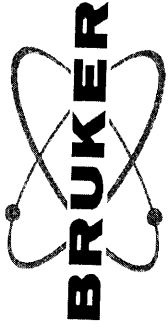

Current Data Parameters  
NAME MAK  
EXPNO 261  
PROCNO 1

F2 - Acquisition Parameters

Date\_ 20110327  
Time\_ 22.53  
INSTRUM spect  
PROBHD 5 mm BBO BB-1H  
PULPROG dept135  
TD 65536  
SOLVENT CDCl3  
NS 192  
DS 8  
SWH 18115.941 Hz  
FIDRES 0.276427 Hz  
AQ 1.8088436 sec  
RG 2050  
DW 27.600 usec  
DE 6.00 usec  
TE 300.0 K  
CNS2 145.0000000  
D1 4.00000000 sec  
d12 0.00002000 sec  
d2 0.00344828 sec  
DELTA 0.00001178 sec  
TDO 1

==== CHANNEL f1 =====  
NUC1 13C  
P1 9.25 usec  
P2 18.50 usec  
PL1 -1.00 dB  
SFO1 75.4745411 MHz

==== CHANNEL f2 =====  
CPDPRG2 waltz16  
NUC2 1H  
P3 11.00 usec  
P4 22.00 usec  
PCPD2 80.00 usec  
PL12 17.00 dB  
PL2 0.00 dB  
SFO2 300.1315007 MHz

F2 - Processing parameters

SF 32768  
SF 75.4677490 MHz  
WDW EM  
SSB 0  
LB 1.00 Hz  
GB 0  
PC 1.40

132.515  
125.094  
43.969

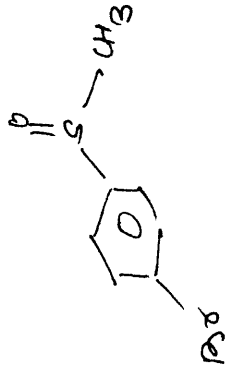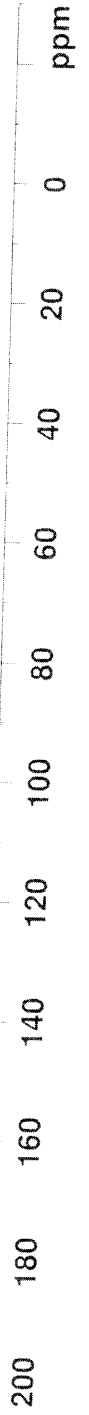

Oxi\_4-bromothiobenzamide

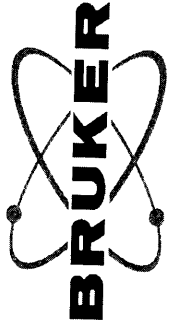

Oxi\_Me-P-Tolyl-Sulfoxide

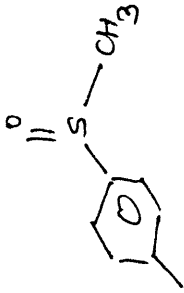

7.508  
7.481  
7.301  
7.275

2.662  
2.389

Current Data Parameters  
NAME MAK  
EXPNO 254  
PROCNO 1

F2 - Acquisition Parameters  
Date\_ 20110325  
Time 22.46  
INSTRUM spect  
PROBHD 5 mm BBO BB-1H  
PULPROG zg30  
TD 65536  
SOLVENT CDC13  
NS 16  
DS 2  
SWH 6188.119 Hz  
FIDRES 0.094423 Hz  
AQ 5.2953587 sec  
RG 71.8  
DW 80.800 usec  
DE 6.00 usec  
TE 300.0 K  
D1 1.00000000 sec  
TD0 1

==== CHANNEL f1 =====  
NUC1 1H  
P1 11.00 usec  
PL1 0.00 dB  
SFO1 300.1318534 MHz

F2 - Processing parameters  
SI 32768  
SF 300.1300000 MHz  
WDW EM  
SSB 0  
LB 0.30 Hz  
GB 0  
PC 1.00

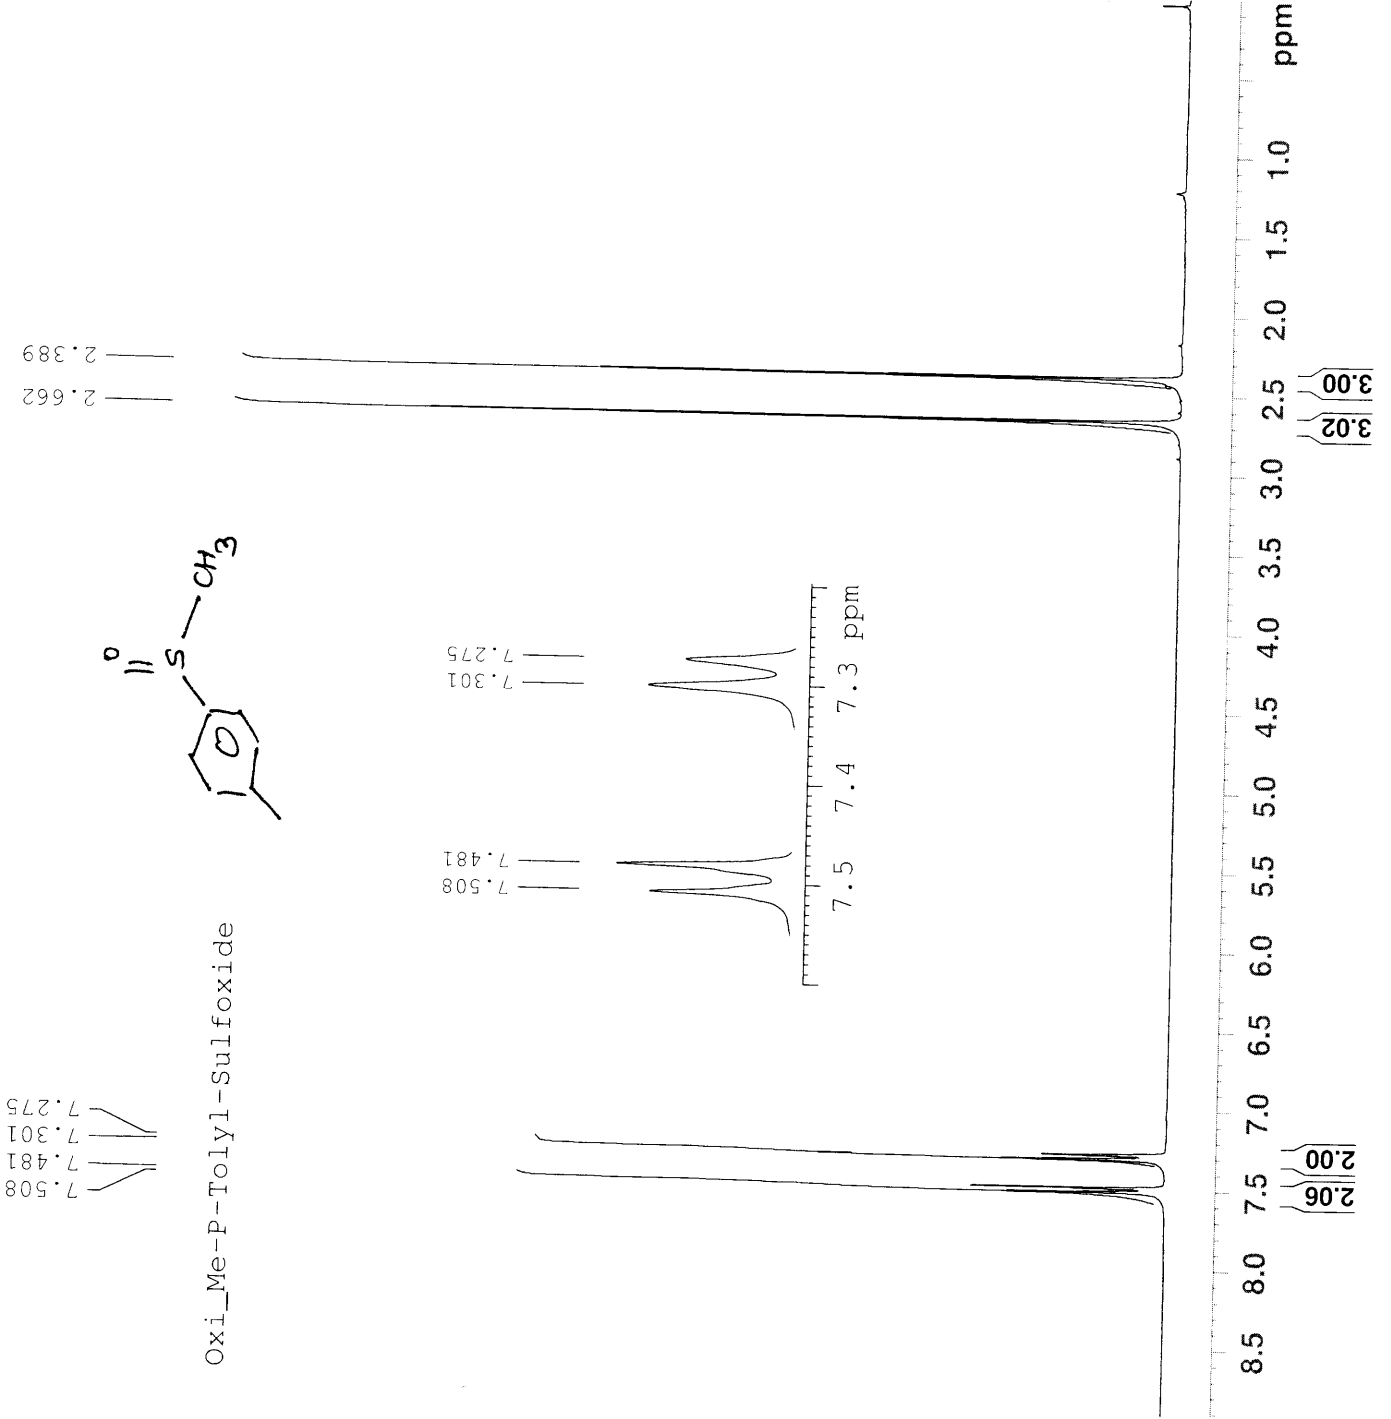

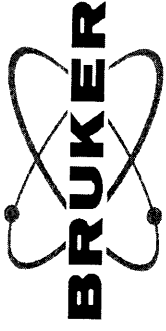

Current Data Parameters  
NAME NAK  
EXPNO 256  
PROCNO 1

F2 - Acquisition Parameters  
Date\_ 20110326  
Time 0.13  
INSTRUM spect  
PROBHD 5 mm BBO BB-1H  
PULPROG zgpg30  
TD 65536  
SOLVENT CDCl3  
NS 521  
DS 4  
SWH 18028.846 Hz  
FIDRES 0.275098 Hz  
AQ 1.8175818 sec  
RG 32800  
DM 27.733 usec  
DE 6.00 usec  
TE 300.0 K  
D1 2.00000000 sec  
d11 0.03000000 sec  
DELTA 1.89999998 sec  
TD0 1

==== CHANNEL f1 =====  
NUC1 13C  
P1 9.25 usec  
PL1 -1.00 dB  
SFO1 75.4752953 MHz

==== CHANNEL f2 =====  
CPDPRG2 waltz16  
NUC2 1H  
PCPD2 80.00 usec  
PL12 17.00 dB  
PL13 17.00 dB  
PL2 0.00 dB  
SFO2 300.1312005 MHz

F2 - Processing parameters  
SI 32768  
SF 75.4677490 MHz  
WDW EM  
SSB 0  
LB 1.00 Hz  
GB 0  
PC 1.40

142.74  
141.26  
129.94  
123.48  
96.10  
77.46  
77.03  
76.61  
44.00  
21.35

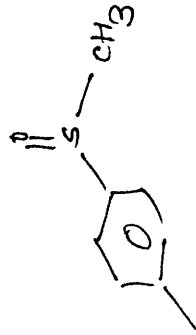

Oxi-Me-P-Tolyl-S

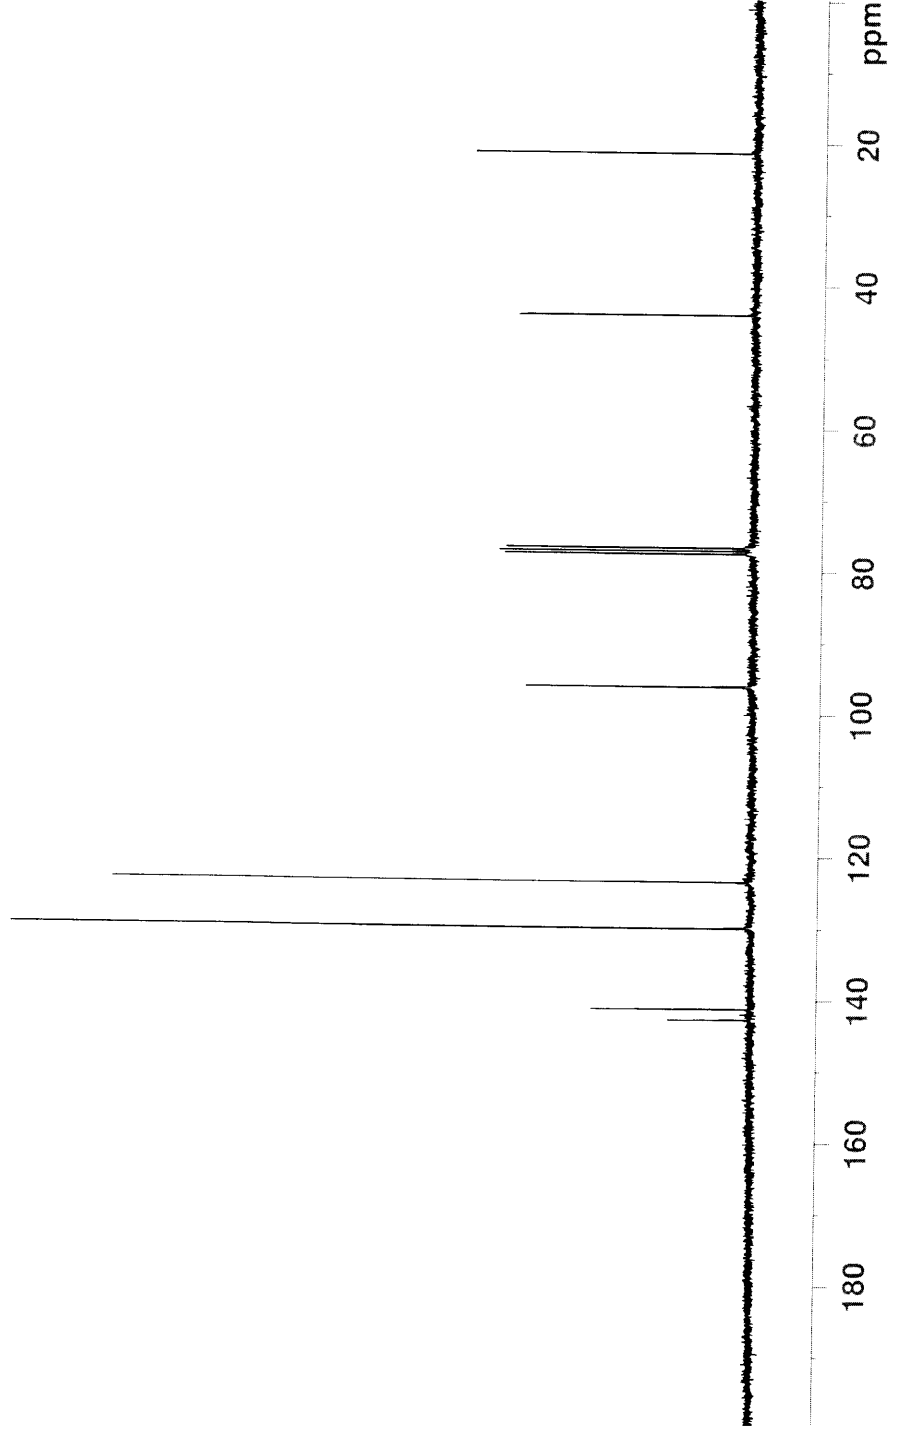

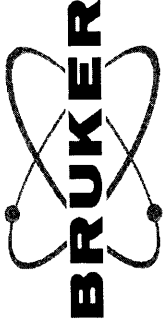

Current Data Parameters  
NAME MAK  
EXPNO 255  
PROCNO 1

F2 - Acquisition Parameters  
Date\_ 20110325  
Time 22.55  
INSTRUM spect  
PROBHD 5 mm BBO BB-1H  
PULPROG dept135  
TD 65536  
SOLVENT CDC13  
NS 515  
DS 8  
SWH 18115.941 Hz  
FIDRES 0.276427 Hz  
AQ 1.8088436 sec  
RG 2050  
DW 27.600 usec  
DE 6.00 usec  
TE 300.0 K  
CNST2 145.0000000  
D1 4.00000000 sec  
d12 0.0002000 sec  
d2 0.00344828 sec  
DELTA 0.00001178 sec  
TD0 1

==== CHANNEL f1 =====  
NUC1 13C  
P1 9.25 usec  
P2 18.50 usec  
PL1 -1.00 dB  
SFO1 75.4745411 MHz

==== CHANNEL f2 =====  
CPDPRG2 waltz16  
NUC2 1H  
P3 11.00 usec  
P4 22.00 usec  
PCPD2 80.00 usec  
PL12 17.00 dB  
PL2 0.00 dB  
SFO2 300.1315007 MHz

F2 - Processing parameters  
SI 32768  
SF 75.4677490 MHz  
WDW EM  
SSB 0  
LB 1.00 Hz  
GB 0  
PC 1.40

21.362

44.004

123.484

129.944

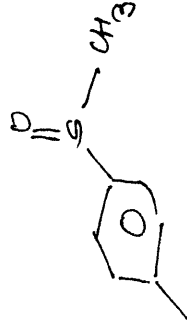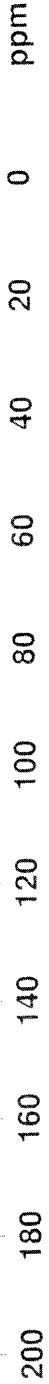

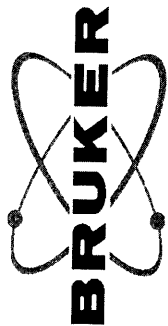

Current Data Parameters  
 NAME MAK  
 EXPNO 263  
 PROCNO 1

F2 - Acquisition Parameters  
 Date\_ 20110328  
 Time 23.09  
 INSTRUM spect  
 PROBHD 5 mm BBO BB-1H  
 PULPROG zg30  
 TD 65536  
 SOLVENT CDCl3  
 NS 16  
 DS 2  
 SWH 6188.119 Hz  
 FIDRES 0.094423 Hz  
 AQ 5.2953587 sec  
 RG 22.6  
 DW 80.800 usec  
 DE 6.00 usec  
 TE 300.0 K  
 D1 1.00000000 sec  
 TD0 1

==== CHANNEL f1 =====  
 NUC1 1H  
 P1 11.00 usec  
 PL1 0.00 dB  
 SFO1 300.1318534 MHz

F2 - Processing parameters  
 SI 32768  
 SF 300.1300000 MHz  
 WDW EM  
 SSB 0  
 LB 0.30 Hz  
 GB 0  
 PC 1.00

2.781  
2.771  
2.758  
2.748  
2.735  
2.726  
2.712  
2.703  
2.689  
2.680  
1.929  
1.918  
1.204  
1.193  
1.181  
1.151  
1.141  
1.128  
1.118  
1.045  
1.033  
1.022

1.204  
1.193  
1.181  
1.151  
1.141  
1.128  
1.118  
1.045  
1.033  
1.022  
1.011

7.505  
7.501  
7.495  
7.489  
7.483  
7.478  
7.472  
7.462  
7.443  
7.437  
7.425  
7.420  
7.411  
7.405  
7.395  
7.388  
7.378

Isopropyl benzene-Soxide

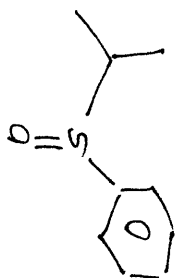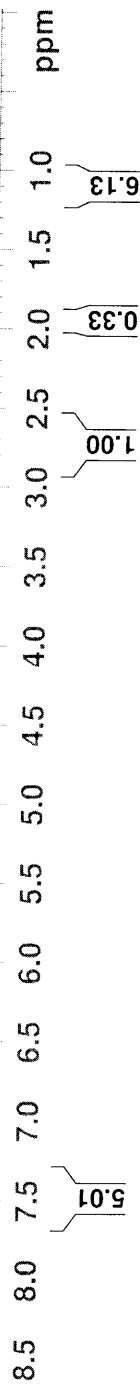

5.01

1.00

0.33

6.13

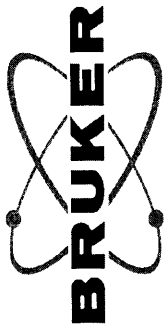

Current Data Parameters  
NAME MAK  
EXPNO 264  
PROCNO 1

F2 - Acquisition Parameters

Date\_ 20110328  
Time 23.37  
INSTRUM spect  
PROBHD 5 mm BBO BB-1H  
PULPROG zgpg30  
TD 65536  
SOLVENT CDC13  
NS 309  
DS 4  
SWH 18028.846 Hz  
FIDRES 0.275098 Hz  
AQ 1.8175818 sec  
RG 32800  
DW 27.733 usec  
DE 6.00 usec  
TE 300.0 K  
D1 2.00000000 sec  
d11 0.03000000 sec  
DELTA 1.89999998 sec  
TD0 1

==== CHANNEL f1 =====  
NUC1 13C  
P1 9.25 usec  
PL1 -1.00 dB  
SFO1 75.4752953 MHz

==== CHANNEL f2 =====  
CPDPRG2 waltz16  
NUC2 1H  
PCPD2 80.00 usec  
PL12 17.00 dB  
PL13 -7.00 dB  
PL2 0.00 dB  
SFO2 300.1312005 MHz

F2 - Processing parameters  
SI 32768  
SF 75.4677490 MHz  
WDW EM  
SSB 0  
LB 1.00 Hz  
GB 0  
PC 1.40

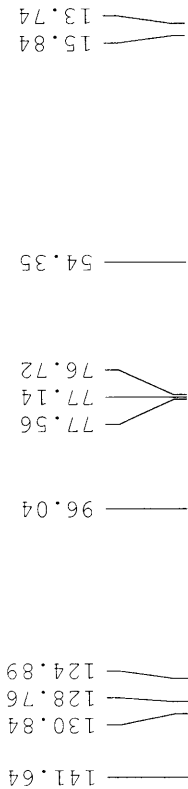

Isopropyl benzene-Soxide

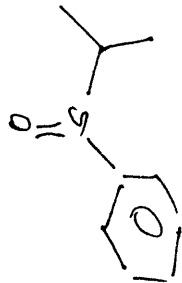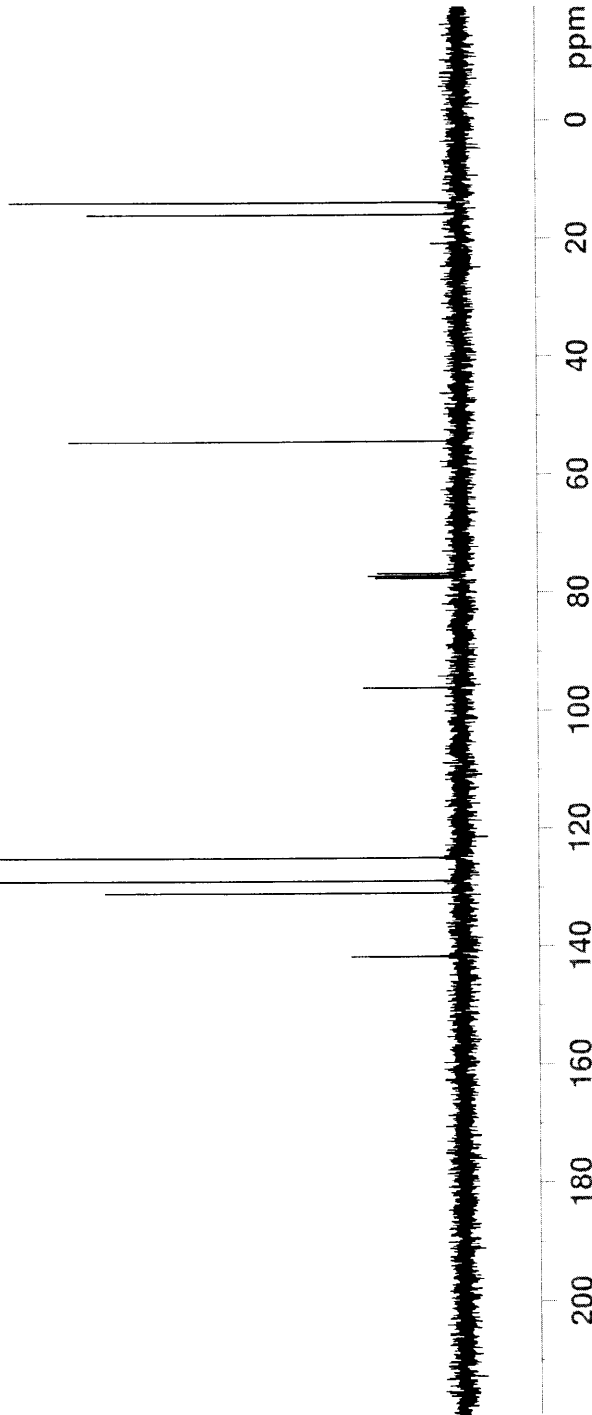



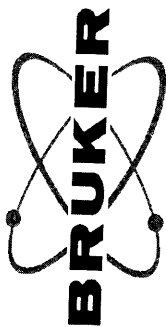

Isopropyl benzene-Soxide

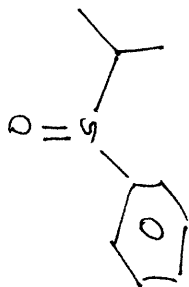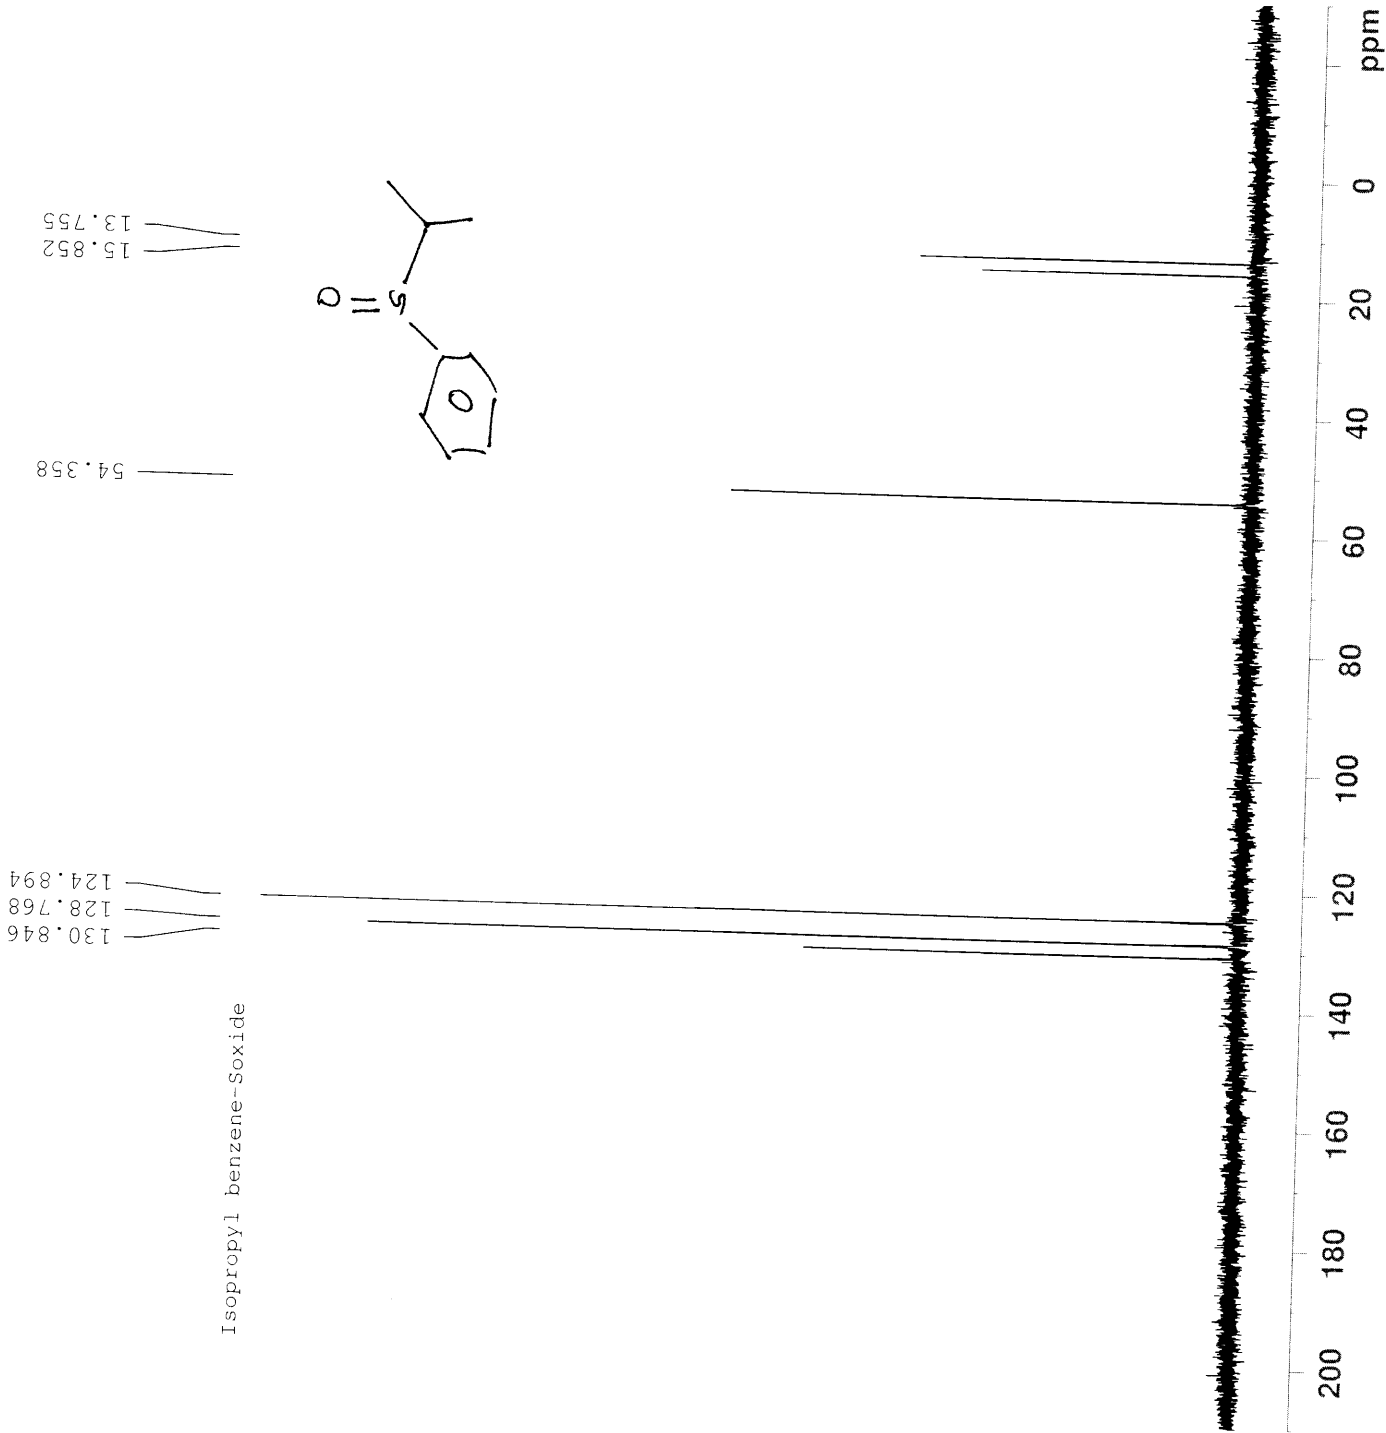

Current Data Parameters  
NAME WAK  
EXPNO 265  
PROCNO 1

F2 - Acquisition Parameters  
Date\_ 20110328  
Time 23.19  
INSTRUM spect  
PROBHD 5 mm BBO BB-1H  
PULPROG depl135  
TD 65536  
SOLVENT CDC13  
NS 179  
DS 8  
SWH 18115.941 Hz  
FIDRES 0.276427 Hz  
AQ 1.8088436 sec  
RG 2050  
DW 27.600 usec  
DE 6.00 usec  
TE 300.0 K  
CNST2 145.0000000  
D1 4.00000000 sec  
d12 0.00002000 sec  
d2 0.00344828 sec  
DELTA 0.00001178 sec  
TD0 1

==== CHANNEL f1 =====  
NUC1 13C  
P1 9.25 usec  
P2 18.50 usec  
PL1 -1.00 dB  
SFO1 75.4745411 MHz

==== CHANNEL f2 =====  
CPDPRG2 waltz16  
NUC2 1H  
P3 11.00 usec  
P4 22.00 usec  
PCPD2 80.00 usec  
PL12 17.00 dB  
PL2 0.00 dB  
SFO2 300.1315007 MHz

F2 - Processing Parameters  
SI 32768  
SF 75.4677490 MHz  
WDW EM  
SSB 0  
LB 1.00 Hz  
GB 0  
PC 1.40

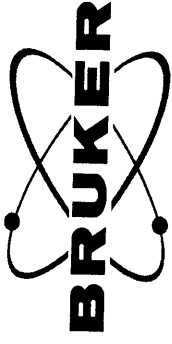

MAM-Oxi-NO2

3.143

Current Data Parameters  
 NAME DNP  
 EXPNO 138  
 PROCNO 1

F2 - Acquisition Parameters  
 Date\_ 20131026  
 Time\_ 14.55  
 INSTRUM spect  
 PROBHD 5 mm BBO BB-IH  
 PULPROG zg30  
 TD 65536  
 SOLVENT CDCl3  
 NS 16  
 DS 2  
 SWH 6188.119 Hz  
 FIDRES 0.09423 Hz  
 AQ 5.2953587 sec  
 RG 181  
 DW 80.800 usec  
 DE 6.00 usec  
 TE 300.0 K  
 D1 1.0000000 sec  
 TDO 1

==== CHANNEL f1 =====  
 NUC1 1H  
 P1 11.38 usec  
 PL1 0.00 dB  
 SFO1 300.1318534 MHz

F2 - Processing parameters  
 SI 32768  
 SF 300.1300000 MHz  
 WDW EM  
 SSB 0  
 LB 0.30 Hz  
 GB 0  
 PC 1.00

8.473  
8.466  
8.459  
8.443  
8.436  
8.429  
8.207  
8.199  
8.192  
8.176  
8.169  
8.162

8.473  
8.466  
8.459  
8.443  
8.436  
8.429

8.207  
8.199  
8.192  
8.176  
8.169  
8.162

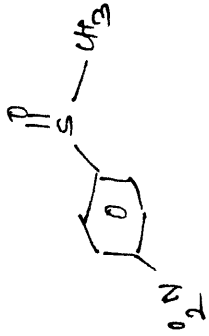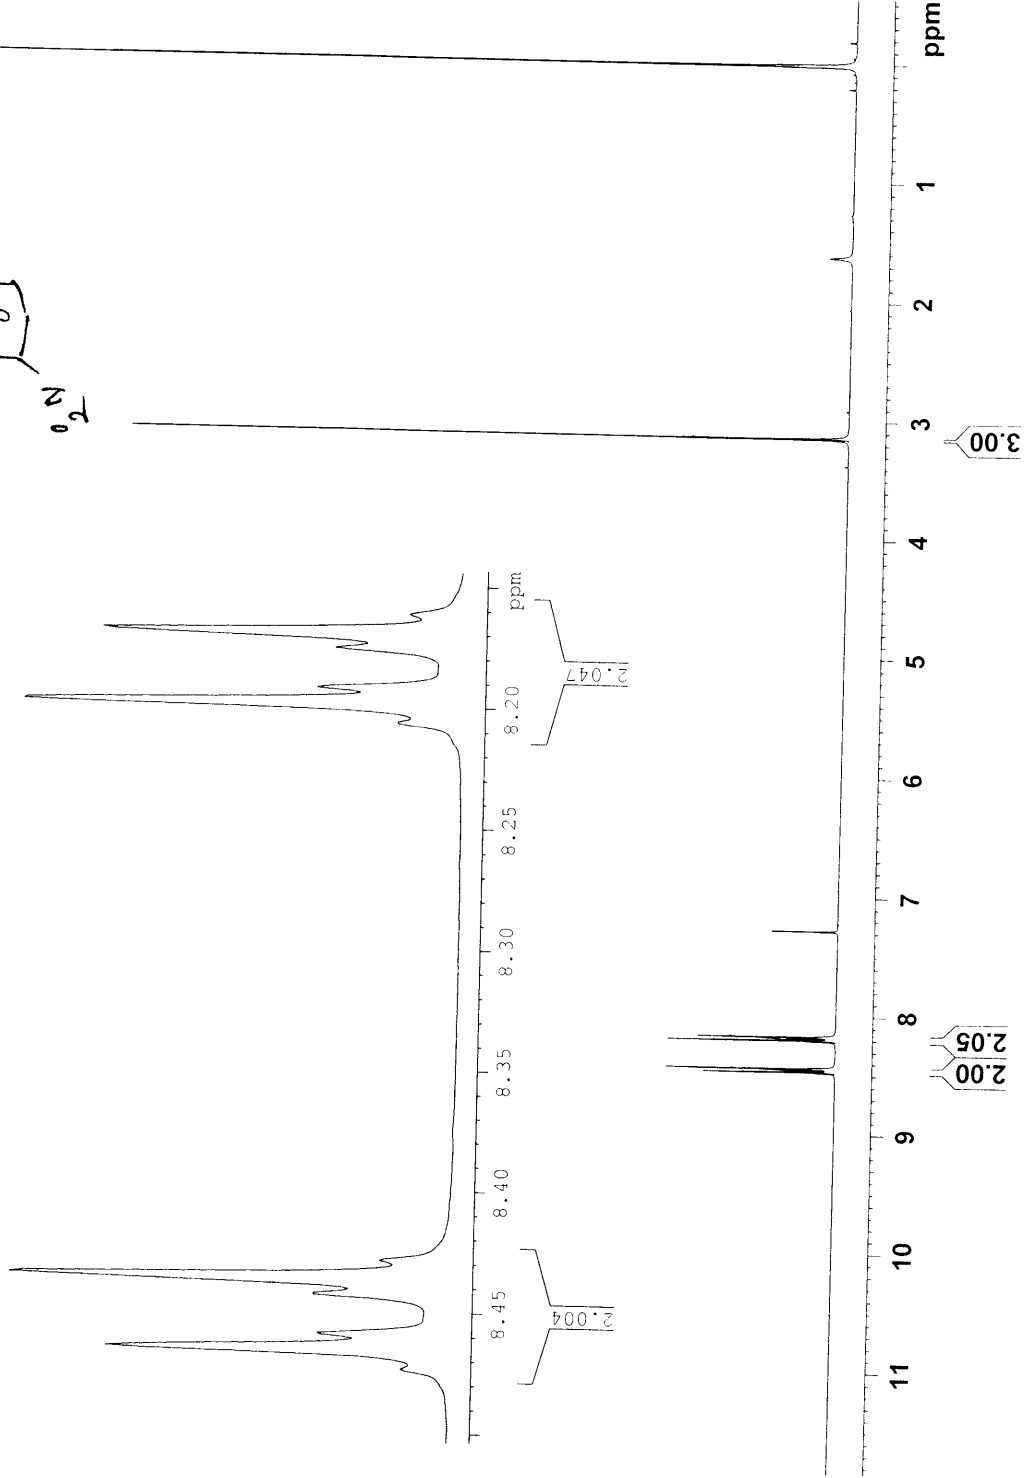

11 10 9 8 7 6 5 4 3 2 1 ppm

3.00

2.00

2.05

2.047

2.004

ppm

MAM-Oxi-NO2

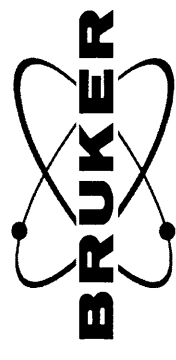

Current Data Parameters  
 NAME DNP  
 EXPNO 139  
 PROCNO 1

F2 - Acquisition Parameters  
 Date\_ 20131026  
 Time\_ 15.01  
 INSTRUM spect  
 PROBHD 5 mm BBO BB-1H  
 PULPROG zgpg30  
 TD 65536  
 SOLVENT CDCl3  
 NS 2056  
 DS 4  
 SWH 18028.846 Hz  
 FIDRES 0.275098 Hz  
 AQ 1.8175818 sec  
 RG 32800  
 DW 27.733 usec  
 DE 6.00 usec  
 TE 300.0 K  
 D1 2.00000000 sec  
 d11 0.03000000 sec  
 DELTA 1.89999998 sec  
 TDO 1

==== CHANNEL f1 =====  
 NUC1 13C  
 P1 9.25 usec  
 PL1 -1.00 dB  
 SF01 75.4752953 MHz

==== CHANNEL f2 =====  
 CPDPRG2 waltz16  
 NUC2 1H  
 PCPD2 80.00 usec  
 PL12 16.94 dB  
 PL13 16.94 dB  
 PL2 0.00 dB  
 SF02 300.1312005 MHz

F2 - Processing parameters  
 SI 32768  
 SF 75.4677490 MHz  
 WDW EM  
 SSB 0  
 LB 1.00 Hz  
 GB C  
 FFC 1.10

44.31

124.65

128.98

145.96

150.89

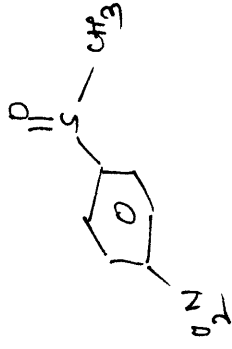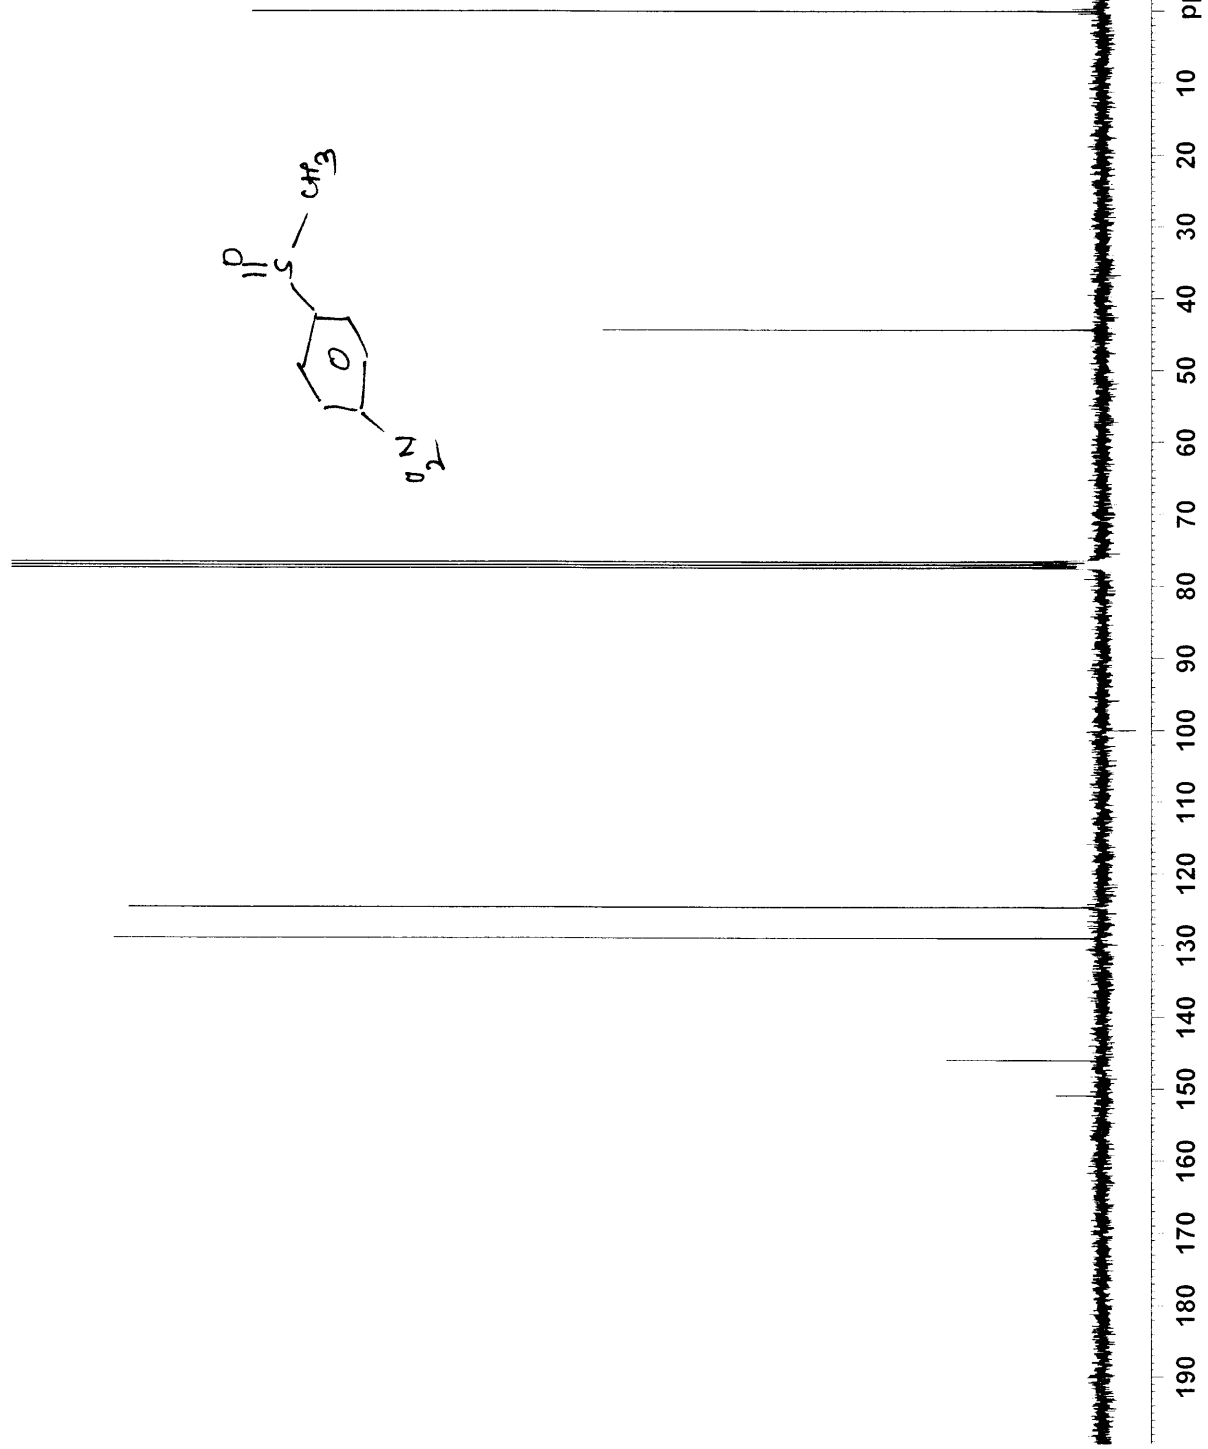

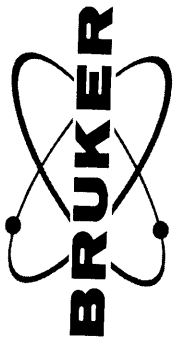

Current Data Parameters  
NAME DNP  
EXPNO 140  
PROCNO 1

F2 - Acquisition Parameters  
Date\_ 20131027  
Time\_ 10.26  
INSTRUM spect  
PROBHD 5 mm BBO BB-1H  
PULPROG zg30  
TD 65536  
SOLVENT CDCl3  
NS 16  
DS 2  
SWH 6188.119 Hz  
FIDRES 0.094423 Hz  
AQ 5.2953587 sec  
RG 256  
DW 80.800 usec  
DE 6.00 usec  
TE 300.0 K  
D1 1.00000000 sec  
TD0 1

==== CHANNEL f1 =====  
NUC1 1H  
P1 11.38 usec  
PL1 0.00 dB  
SFO1 300.1318534 MHz

F2 - Processing parameters  
SI 32768  
SF 300.1300000 MHz  
WDW EM  
SSB 0  
LB 0.30 Hz  
GB 0  
PC 1.00

10.112

8.088  
8.066  
8.061  
7.862  
7.834  
7.281

2.814

MAM-OXI-CHO

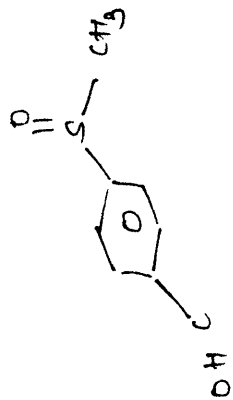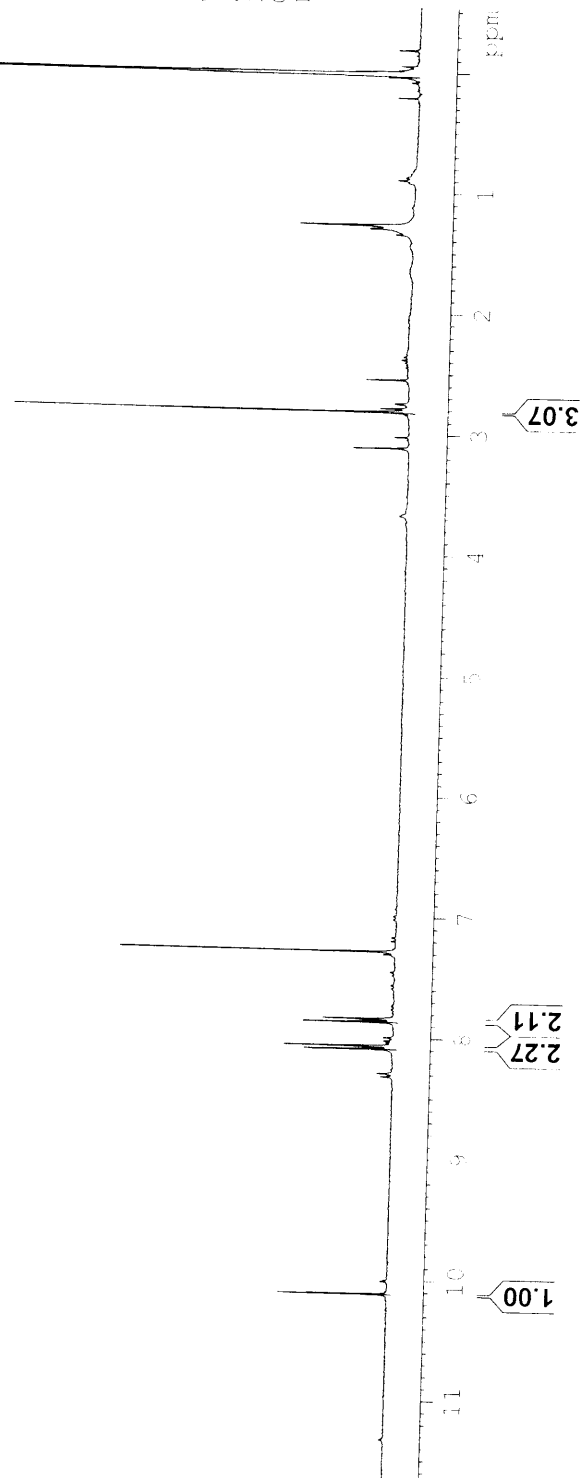

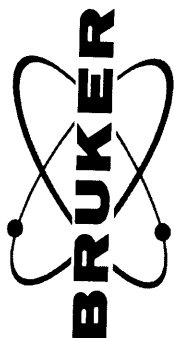

MAM QXI-CHO

191.09  
152.43  
138.19  
130.44  
124.20

43.74

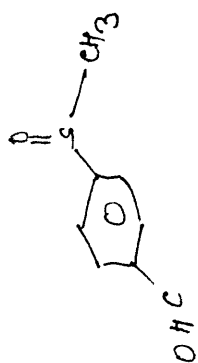

Current Data Parameters  
NAME DNP  
EXPNO 141  
PROCNO 1

F2 - Acquisition Parameters  
Date\_ 20131027  
Time\_ 11.58  
INSTRUM spect  
PROBHD 5 mm BBO BB-1H  
PULPROG zgpg30  
TD 65536  
SOLVENT CDCl3  
NS 3500  
DS 4  
SWH 18028.846 Hz  
FIDRES 0.275098 Hz  
AQ 1.8175818 sec  
RG 32800  
DW 27.733 usec  
DE 6.00 usec  
TE 300.0 K  
D1 2.0000000 sec  
d11 0.0300000 sec  
DELTA 1.89999998 sec  
TDO 1

==== CHANNEL f1 =====  
NUC1 13C  
P1 9.25 usec  
PL1 -1.00 dB  
SFO1 75.4752953 MHz

==== CHANNEL f2 =====  
CPDPRG2 waltz16  
NUC2 1H  
PCPD2 80.00 usec  
PL12 16.94 dB  
PL13 16.94 dB  
PL2 0.00 dB  
SFO2 300.1312005 MHz

F2 - Processing parameters  
SI 32768  
SF 75.4677490 MHz  
WDW EM  
SSB 0  
LB 1.00 Hz  
GB 0  
PC 1.40

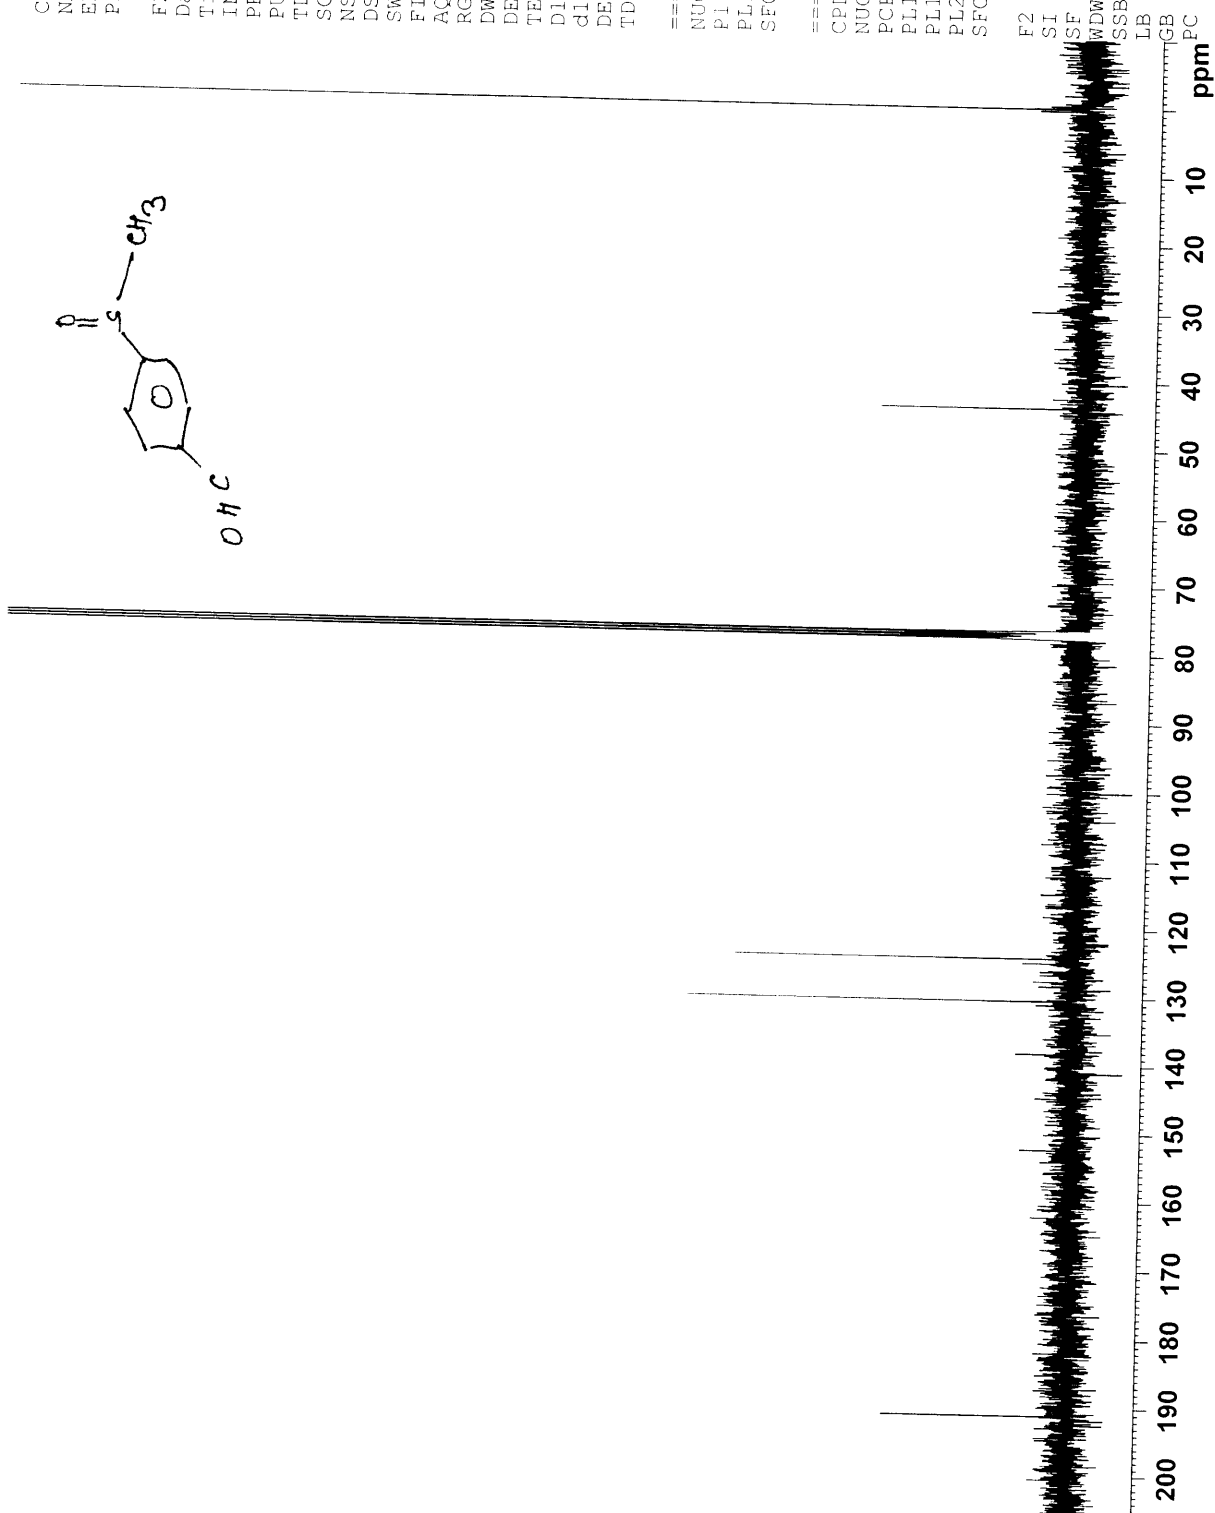

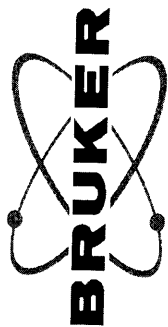

Current Data Parameters  
 NAME MAK  
 EXPNO 257  
 PROCNO 1

F2 - Acquisition Parameters  
 Date\_ 20110327  
 Time 16.07  
 INSTRUM spect  
 PROBHD 5 mm BBO BB-1H  
 PULPROG zg30  
 ID 65536  
 SOLVENT CDCl3  
 NS 16  
 DS 2  
 SWH 6188.119 Hz  
 FIDRES 0.094423 Hz  
 AQ 5.2953587 sec  
 RG 50.8  
 DW 80.800 usec  
 DE 6.00 usec  
 TE 300.0 K  
 D1 1.00000000 sec  
 TD0 1

==== CHANNEL f1 =====  
 NUC1 1H  
 P1 11.00 usec  
 PL1 0.00 dB  
 SFO1 300.1318534 MHz

F2 - Processing parameters  
 SI 32768  
 SF 300.1300000 MHz  
 WDW EM  
 SSB G  
 LB 0.30 Hz  
 GB 0  
 PC 1.00

Oxi\_Phenylthioethanol-sulfoxide

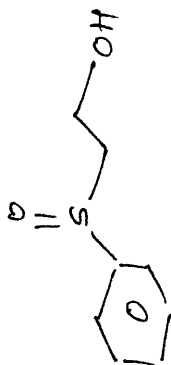

7.575  
7.567  
7.552  
7.496  
7.486  
7.484  
7.478  
7.468  
7.453  
7.447  
7.446  
7.442  
7.432  
7.431  
7.408  
7.403  
7.268  
4.529  
4.132  
4.120  
4.103  
4.092  
4.080  
4.063  
4.050  
3.903  
3.887  
3.871  
3.865  
3.847  
3.832  
3.076  
3.060  
3.046  
3.031  
3.016  
3.002  
2.986  
2.934  
2.920  
2.918  
2.905  
2.890  
2.876  
2.874  
2.861

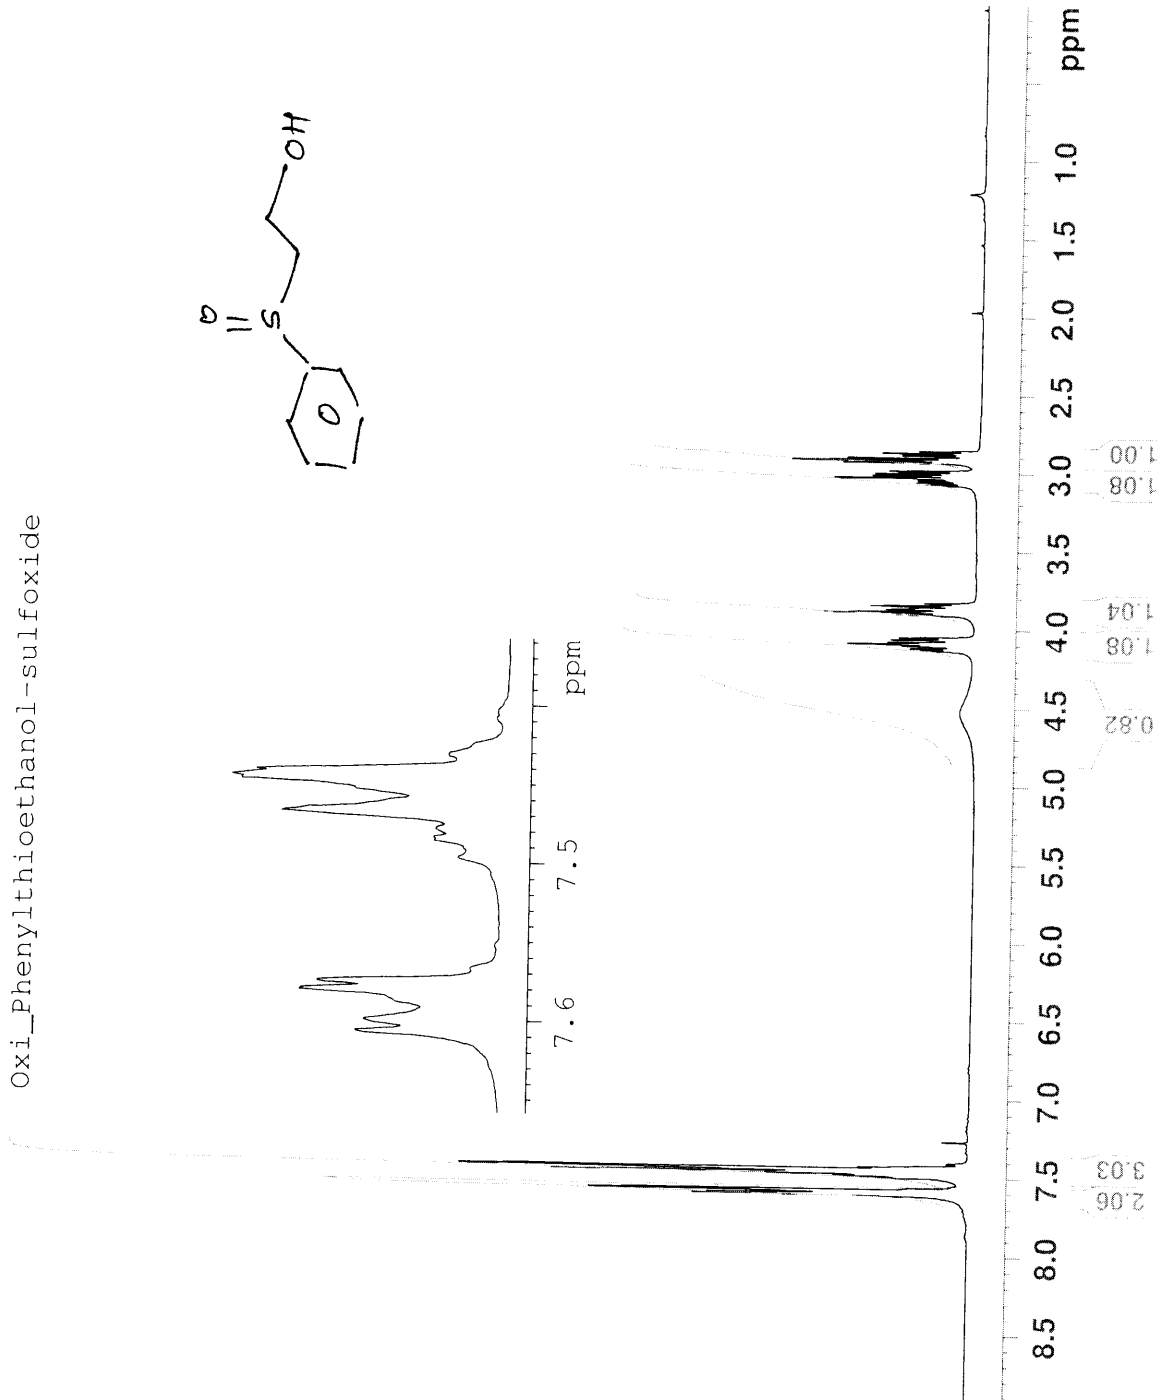

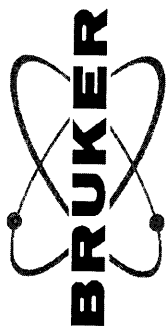

Oxi\_Phenylthioethanol

Current Data Parameters  
NAME MAK  
EXPNO 259  
PROCNO 1

F2 - Acquisition Parameters  
Date\_ 20110327  
Time 20.30  
INSTRUM spect  
PROBHD 5 mm BBO BB-1H  
PULPROG zgpg30  
TD 65536  
SOLVENT CDC13  
NS 2500  
DS 4  
SWH 18028.846 Hz  
FIDRES 0.275098 Hz  
AQ 1.8175818 sec  
RG 32800  
DW 27.733 usec  
DE 6.00 usec  
TE 300.0 K  
D1 2.00000000 sec  
d11 0.03000000 sec  
DELTA 1.89999998 sec  
TD0 1

==== CHANNEL f1 =====  
NUC1 13C  
P1 9.25 usec  
PL1 -1.00 dB  
SFO1 75.4752953 MHz

==== CHANNEL f2 =====  
CPDPRG2 waltz16  
NUC2 1H  
PCPD2 80.00 usec  
PL12 17.00 dB  
PL13 17.00 dB  
PL2 0.00 dB  
SFO2 300.1312005 MHz

F2 - Processing parameters  
SI 32768  
SF 75.4677490 MHz  
WDW EM  
SSB 0  
LB 1.00 Hz  
GB 0  
PC 1.40

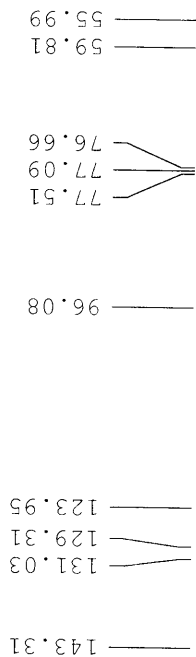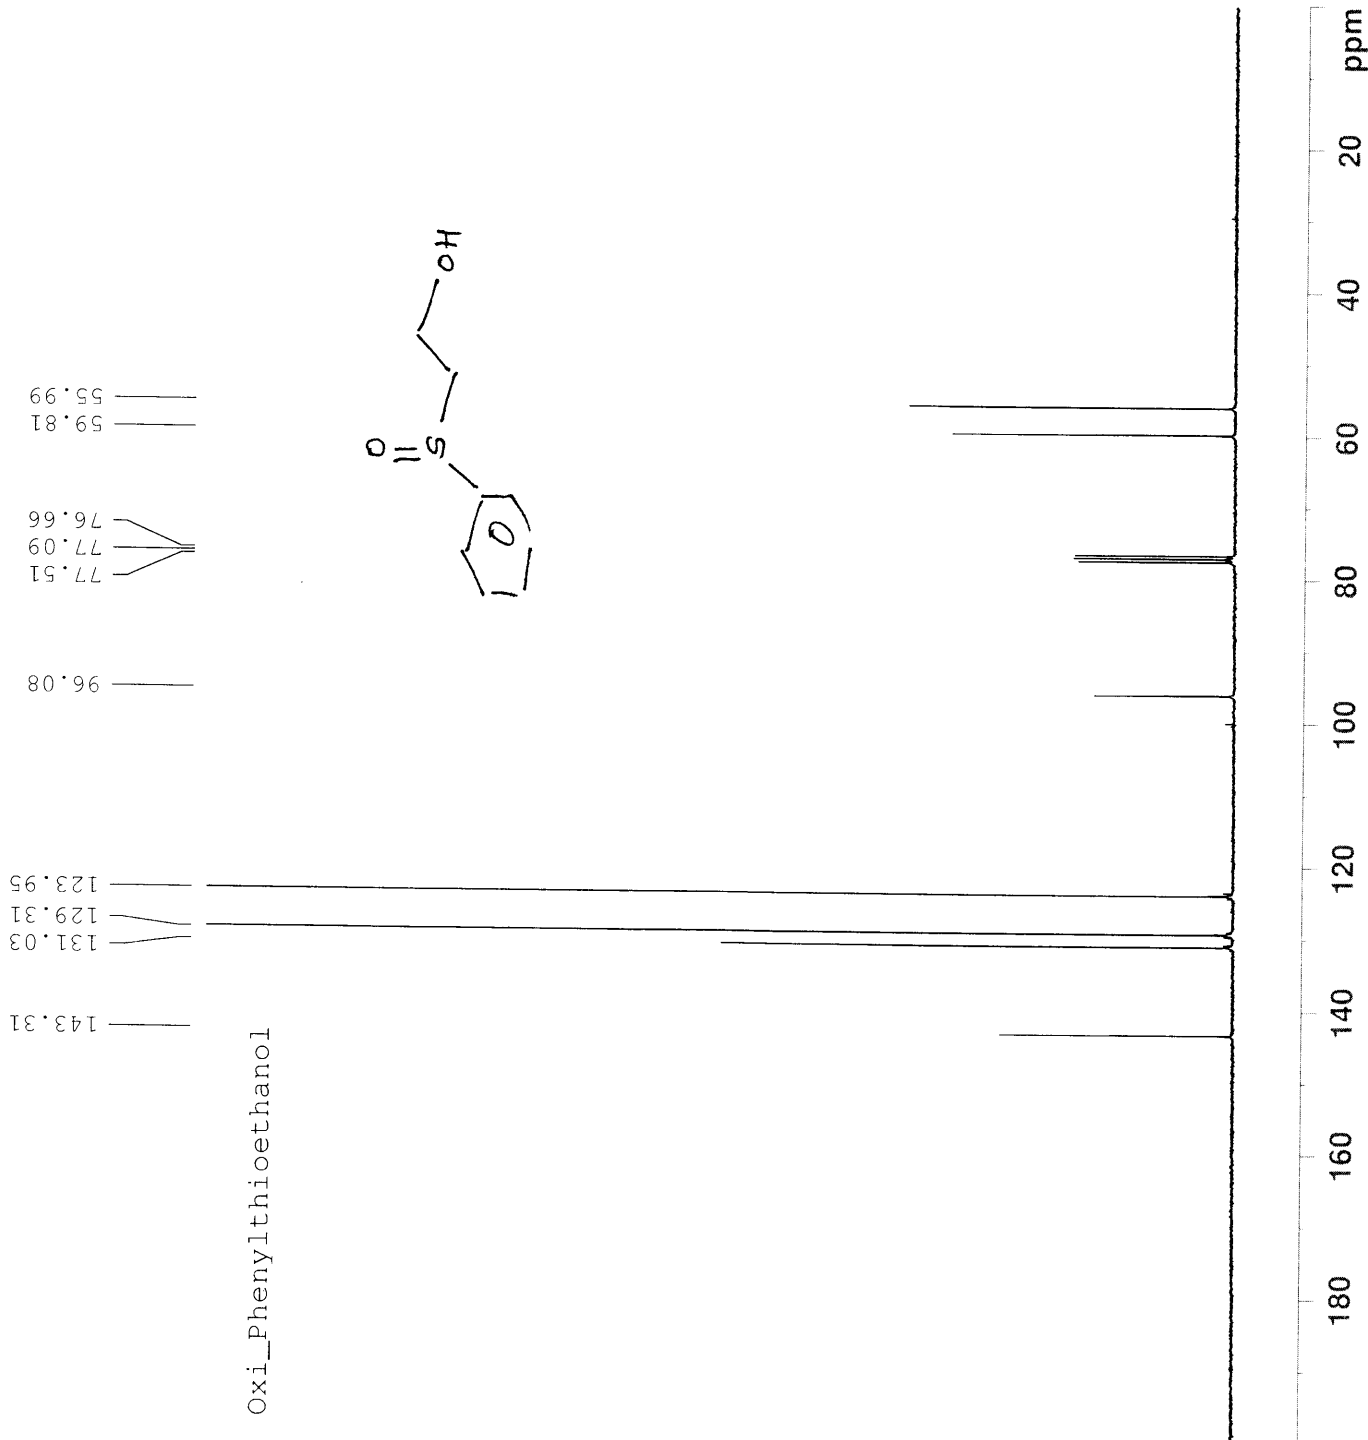

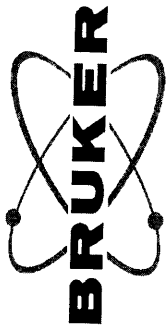

Oxi\_Phenylthioethanol

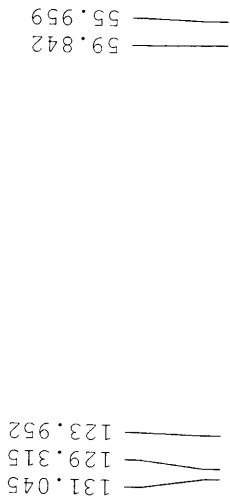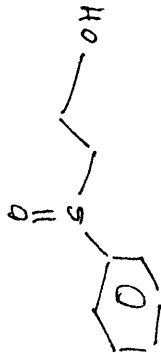

Current Data Parameters  
NAME MAK  
EXPNO 258  
PROCNO 1

F2 - Acquisition Parameters  
Date\_ 20110327  
Time 16.11  
INSTRUM spect  
PROBHD 5 mm BBO BB-1H  
PULPROG dept135  
TD 65536  
SOLVENT CDCl3  
NS 1007  
DS 8  
SWH 18115.941 Hz  
FIDRES 0.276427 Hz  
AQ 1.8088436 sec  
RG 2050  
DW 27.600 usec  
DE 6.00 usec  
TE 300.0 K  
CNST2 145.0000000 sec  
D1 4.00000000 sec  
d12 0.00002000 sec  
d2 0.00344828 sec  
DELTA 0.00001178 sec  
TD0 1

==== CHANNEL f1 =====  
NUC1 13C  
P1 9.25 usec  
P2 18.50 usec  
PL1 -1.00 dB  
SFO1 75.4745411 MHz

==== CHANNEL f2 =====  
CPDPRG2 waltz16  
NUC2 1H  
P3 11.00 usec  
P4 22.00 usec  
PCPD2 80.00 usec  
PL2 17.00 dB  
PL2 0.00 dB  
SFO2 300.1315007 MHz

F2 - Processing parameters  
SI 32768  
SF 75.4677490 MHz  
WDW EM  
SSB 0  
LB 1.00 Hz  
GB 0  
PC 1.40

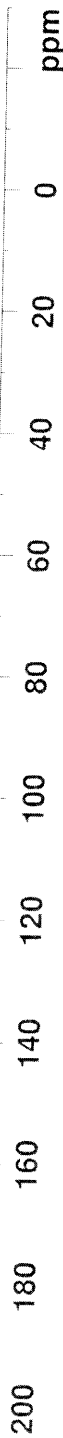



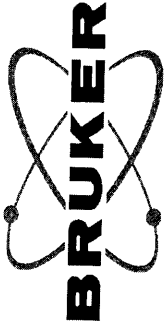

Current Data Parameters  
 NAME MAK  
 EXPNO 276  
 PROCNO 1

F2 - Acquisition Parameters  
 Date\_ 20110407  
 Time\_ 14.34  
 INSTRUM spect  
 PROBHD 5 mm BBO BB-1H  
 PULPROG zg30  
 TD 65536  
 SOLVENT CDC13  
 NS 16  
 DS 2  
 SWH 6188.119 Hz  
 FIDRES 0.094423 Hz  
 AQ 5.2953587 sec  
 RG 50.8  
 DW 80.800 usec  
 DE 6.00 usec  
 TE 300.0 K  
 D1 1.0000000 sec  
 TD0 1

==== CHANNEL f1 =====  
 NUC1 1H  
 P1 11.00 usec  
 PL1 0.00 dB  
 SFO1 300.1318534 MHz

F2 - Processing parameters  
 SI 32768  
 SF 300.1300000 MHz  
 WDW EM  
 SSB 0  
 LB 0.30 Hz  
 GB 0  
 PC 1.00

7.645  
7.527  
7.519  
7.491  
7.476  
7.269  
3.209  
3.188  
3.173  
3.166  
3.159  
3.144  
3.136  
2.922  
2.916  
2.894  
2.887  
2.875  
2.841  
2.832  
2.818  
2.789  
2.783  
2.762  
2.742  
2.733  
2.507  
2.480  
2.475  
2.470  
2.463  
2.440  
2.434  
2.425  
2.413  
2.402  
2.396  
2.385  
2.025  
0.020

Oxi\_TP+AN

3.209  
3.188  
3.173  
3.166  
3.159  
3.144  
3.136  
2.922  
2.916  
2.894  
2.887  
2.875  
2.841  
2.832  
2.818  
2.789  
2.783  
2.762  
2.742  
2.733  
2.507  
2.480  
2.475  
2.470  
2.463  
2.440  
2.434  
2.425

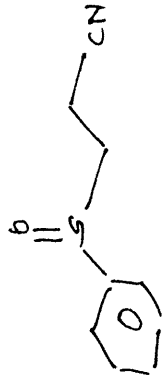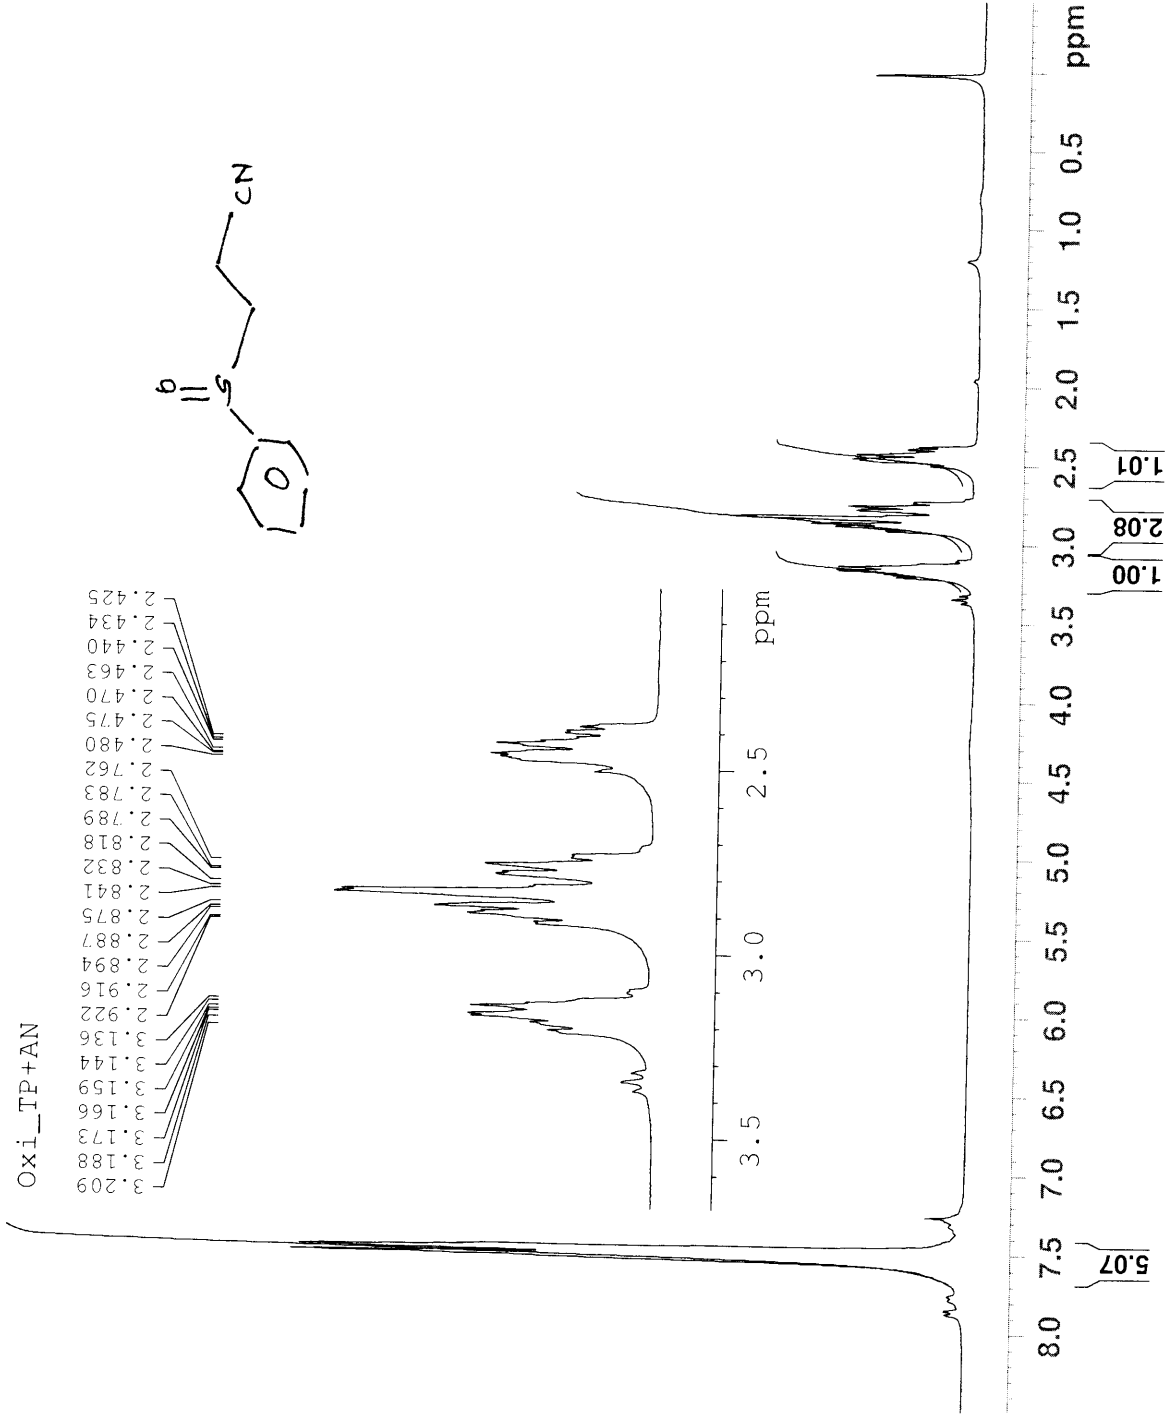

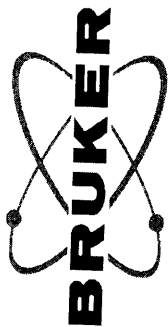

Oxi\_TP+AN

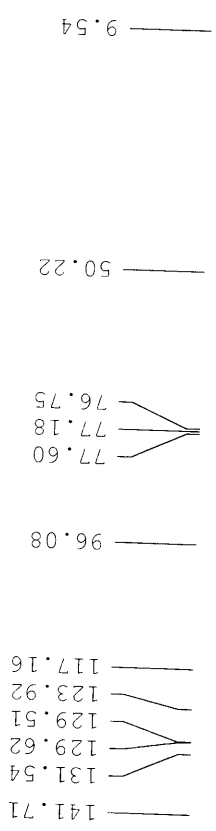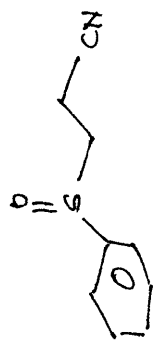

Current Data Parameters  
NAME MAK  
EXPNO 277  
PROCNO 1

F2 - Acquisition Parameters  
Date\_ 20110407  
Time 15.03  
INSTRUM spect  
PROBHD 5 mm BBO BB-1H  
PULPROG zgpg30  
TD 65536  
SOLVENT CDC13  
NS 1757  
DS 4  
SWH 18028.846 Hz  
FIDRES 0.275098 Hz  
AQ 1.8175818 sec  
RG 32800  
DW 27.733 usec  
DE 6.00 usec  
TE 300.0 K  
D1 2.0000000 sec  
d11 0.0300000 sec  
DELTA 1.8999998 sec  
TD0 1

==== CHANNEL f1 =====  
NUC1 13C  
P1 9.25 usec  
PL1 -1.00 dB  
SFO1 75.4752953 MHz  
  
==== CHANNEL f2 =====  
CPDPRG2 waltz16  
NUC2 1H  
PCPD2 80.00 usec  
PL12 17.00 dB  
PL13 17.00 dB  
PL2 0.00 dB  
SFO2 300.1312005 MHz

F2 - Processing parameters  
SI 32768  
SF 75.4677490 MHz  
WDW EM  
SSB 0  
LB 1.00 Hz  
GB 0  
PC 1.40

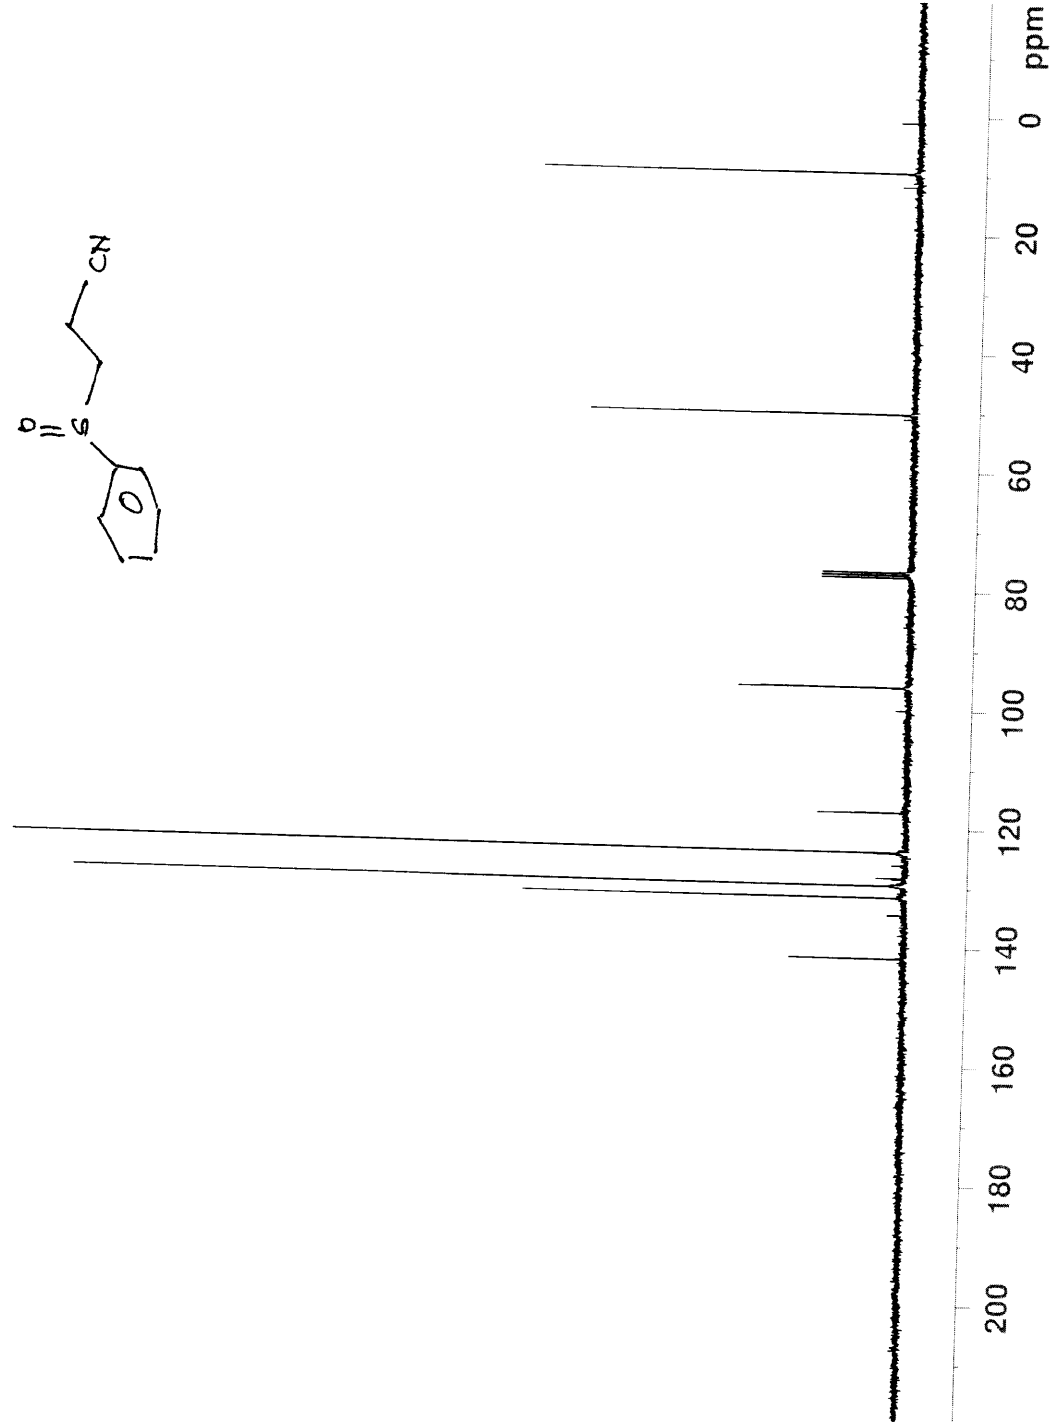

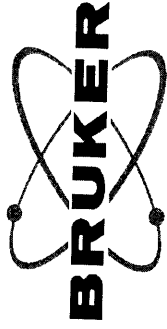

Current Data Parameters  
NAME: MAM  
EXPNO: 278  
PROCNO: 1

F2 - Acquisition Parameters  
Date\_: 20110407  
Time: 18.16  
INSTRUM: spect  
PROBHD: 5 mm BBO BB-1H  
PULPROG: dept135  
TD: 65536  
SOLVENT: CDCl3  
NS: 1125  
DS: 8  
SWH: 18115.941 Hz  
FIDRES: 0.276427 Hz  
AQ: 1.8088436 sec  
RG: 2050  
DW: 27.600 usec  
DE: 6.00 usec  
TE: 300.0 K  
CNST2: 145.0000000  
d1: 4.0000000 sec  
d12: 0.0000200 sec  
d2: 0.0034828 sec  
DELTA: 0.00001178 sec  
TD0: 1

==== CHANNEL f1 =====  
NUC1: 13C  
P1: 9.25 usec  
PL1: 18.50 usec  
SFO1: -1.00 dB  
75.4745411 MHz  
==== CHANNEL f2 =====  
CPDPRG2: waitz16  
NDC2: 1H  
P3: 11.00 usec  
P4: 22.00 usec  
PCPD2: 80.00 usec  
PL12: 17.00 dB  
PL2: 0.00 dB  
SFO2: 300.1315007 MHz

F2 - Processing parameters  
SI: 32768  
SF: 75.4677490 MHz  
WDW: EM  
SSB: 0  
LB: 1.00 Hz  
GB: 0  
PC: 1.40

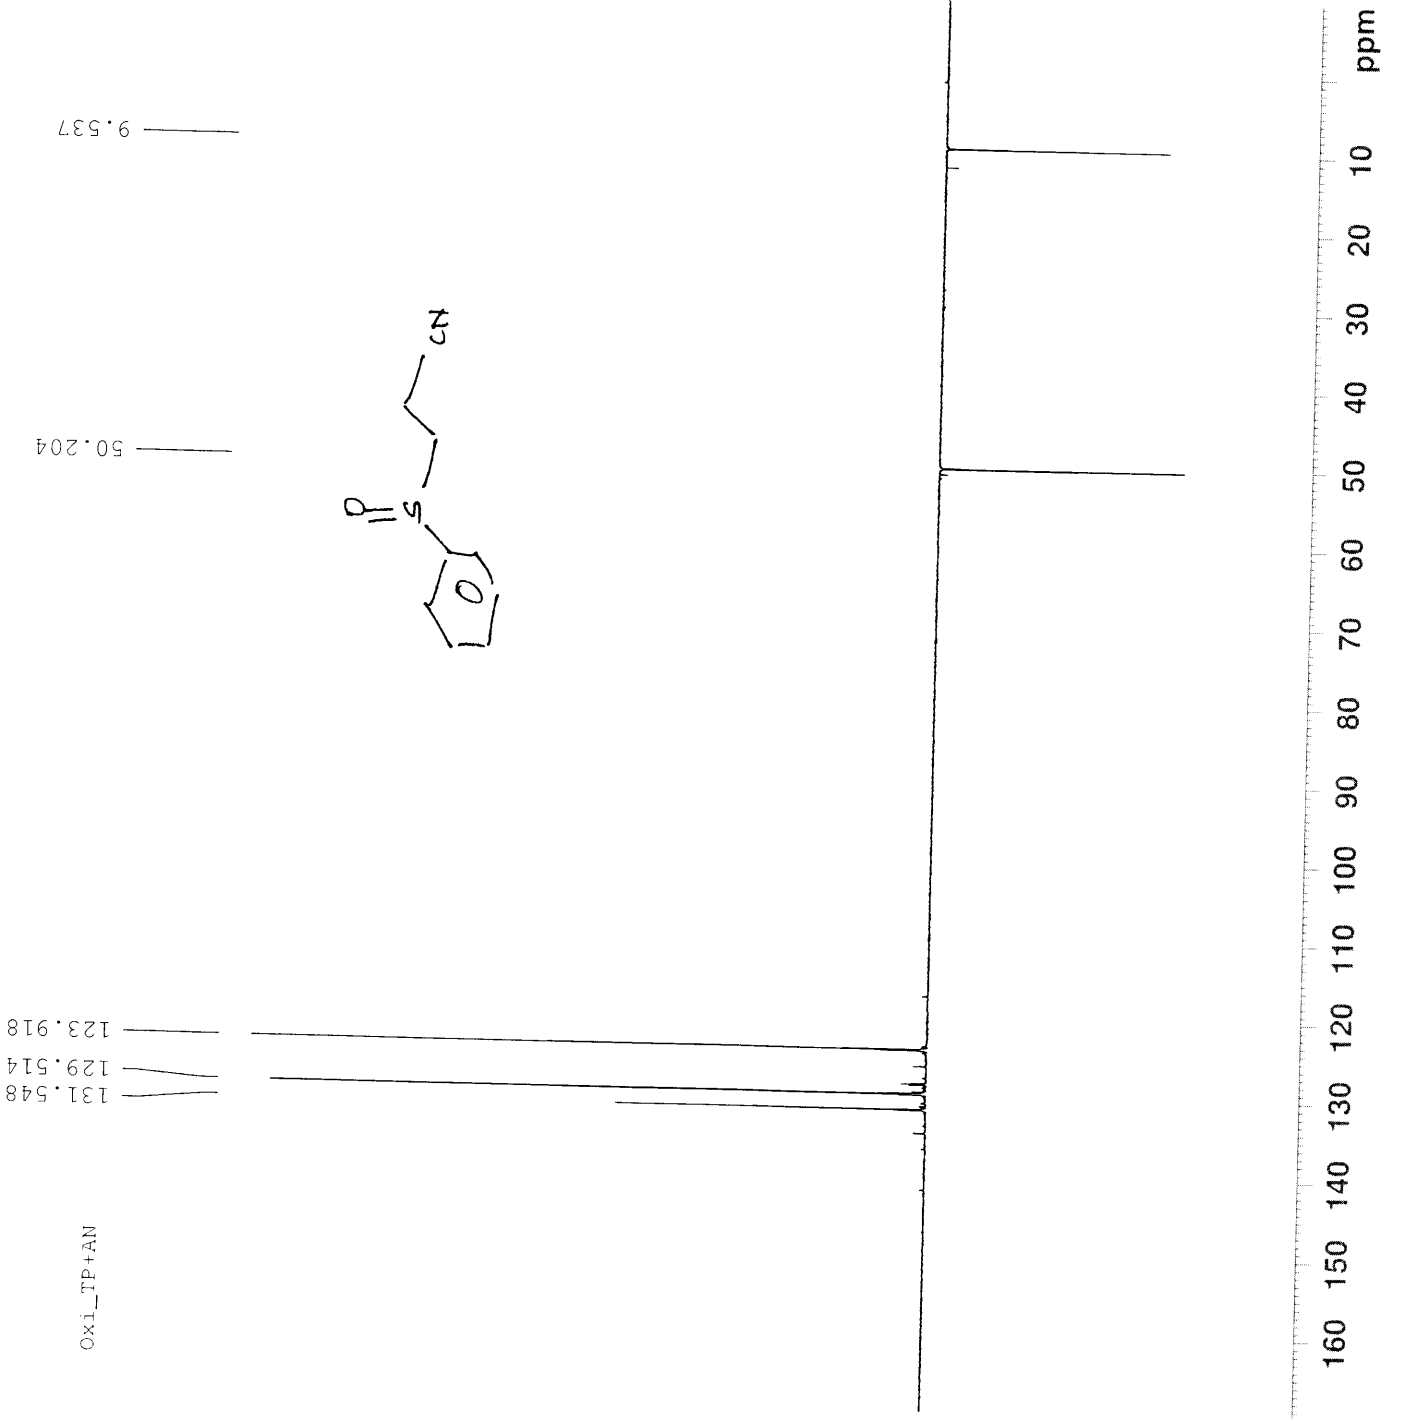

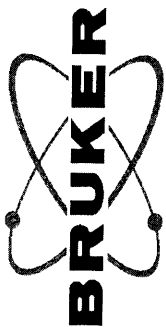

Current Data Parameters  
 NAME MAK  
 EXPNO 273  
 PROCNO 1

F2 - Acquisition Parameters  
 Date\_ 20110406  
 Time 21.53  
 INSTRUM spect  
 PROBHD 5 mm BBO BB-1H  
 PULPROG zg30  
 TD 65536  
 SOLVENT CDC13  
 NS 16  
 DS 2  
 SWH 6188.119 Hz  
 FIDRES 0.094423 Hz  
 AQ 5.2953587 sec  
 RG 50.8  
 DW 80.800 usec  
 DE 6.00 usec  
 TE 300.0 K  
 D1 1.00000000 sec  
 TD0 1

==== CHANNEL f1 =====  
 NUC1 1H  
 P1 11.00 usec  
 PL1 0.00 dB  
 SFO1 300.1318534 MHz

F2 - Processing parameters  
 SI 32768  
 SF 300.1300000 MHz  
 WDW EM  
 SSB 0  
 LB 0.30 Hz  
 GB 0  
 PC 1.00

0.025

7.556  
7.550  
7.545  
7.536  
7.506  
7.502  
7.495  
7.488  
7.477  
7.463  
7.456  
7.453  
7.438  
7.434  
3.600  
3.223  
3.201  
3.194  
3.179  
3.173  
3.156  
3.151  
3.130  
2.932  
2.913  
2.905  
2.886  
2.870  
2.860  
2.843  
2.828  
2.807  
2.779  
2.772  
2.750  
2.746  
2.723  
2.529  
2.511  
2.503  
2.483  
2.474  
2.456  
2.446  
2.427

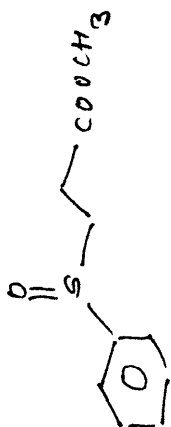

3.201  
3.194  
3.179  
3.173  
3.156  
3.151  
3.130  
2.828  
2.843  
2.860  
2.886  
2.905  
2.913  
2.932  
2.746  
2.750  
2.772  
2.779  
2.750  
2.772  
2.483  
2.503  
2.511

3.2 3.0 2.8 2.6 ppm

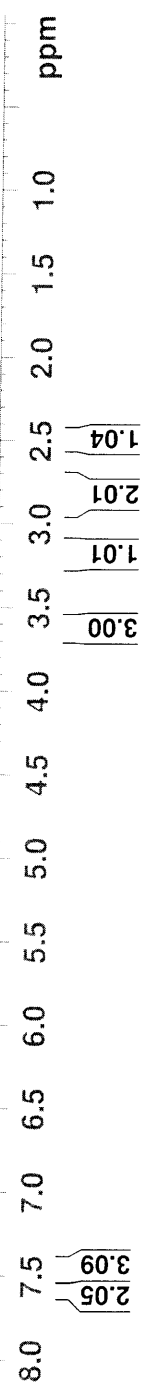

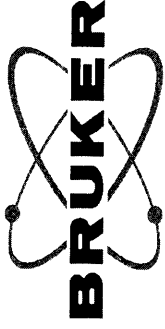

Current Data Parameters  
NAME MAK  
EXPNO 275  
PROCNO 1

F2 - Acquisition Parameters  
Date\_ 20110406  
Time 23.10  
INSTRUM spect  
PROBHD 5 mm BBO BB-1H  
PULPROG zgpg30  
TD 65536  
SOLVENT CDCl3  
NS 502  
DS 4  
SWH 18028.846 Hz  
FIDRES 0.275098 Hz  
AQ 1.8175818 sec  
RG 32800  
DW 27.733 usec  
DE 6.00 usec  
TE 300.0 K  
D1 2.00000000 sec  
d11 0.03000000 sec  
DELTA 1.89999998 sec  
TD0 1

==== CHANNEL f1 =====  
NUC1 13C  
P1 9.25 usec  
PL1 -1.00 dB  
SFO1 75.4752953 MHz

==== CHANNEL f2 =====  
CPDPRG2 waltz16  
NUC2 1H  
PGPD2 80.00 usec  
PL12 17.00 dB  
PL13 17.00 dB  
PL2 0.00 dB  
SFO2 300.1312005 MHz

F2 - Processing parameters  
SI 32768  
SF 75.4677490 MHz  
WDW EM  
SSB 0  
LB 1.00 Hz  
GB 0  
PC 1.40

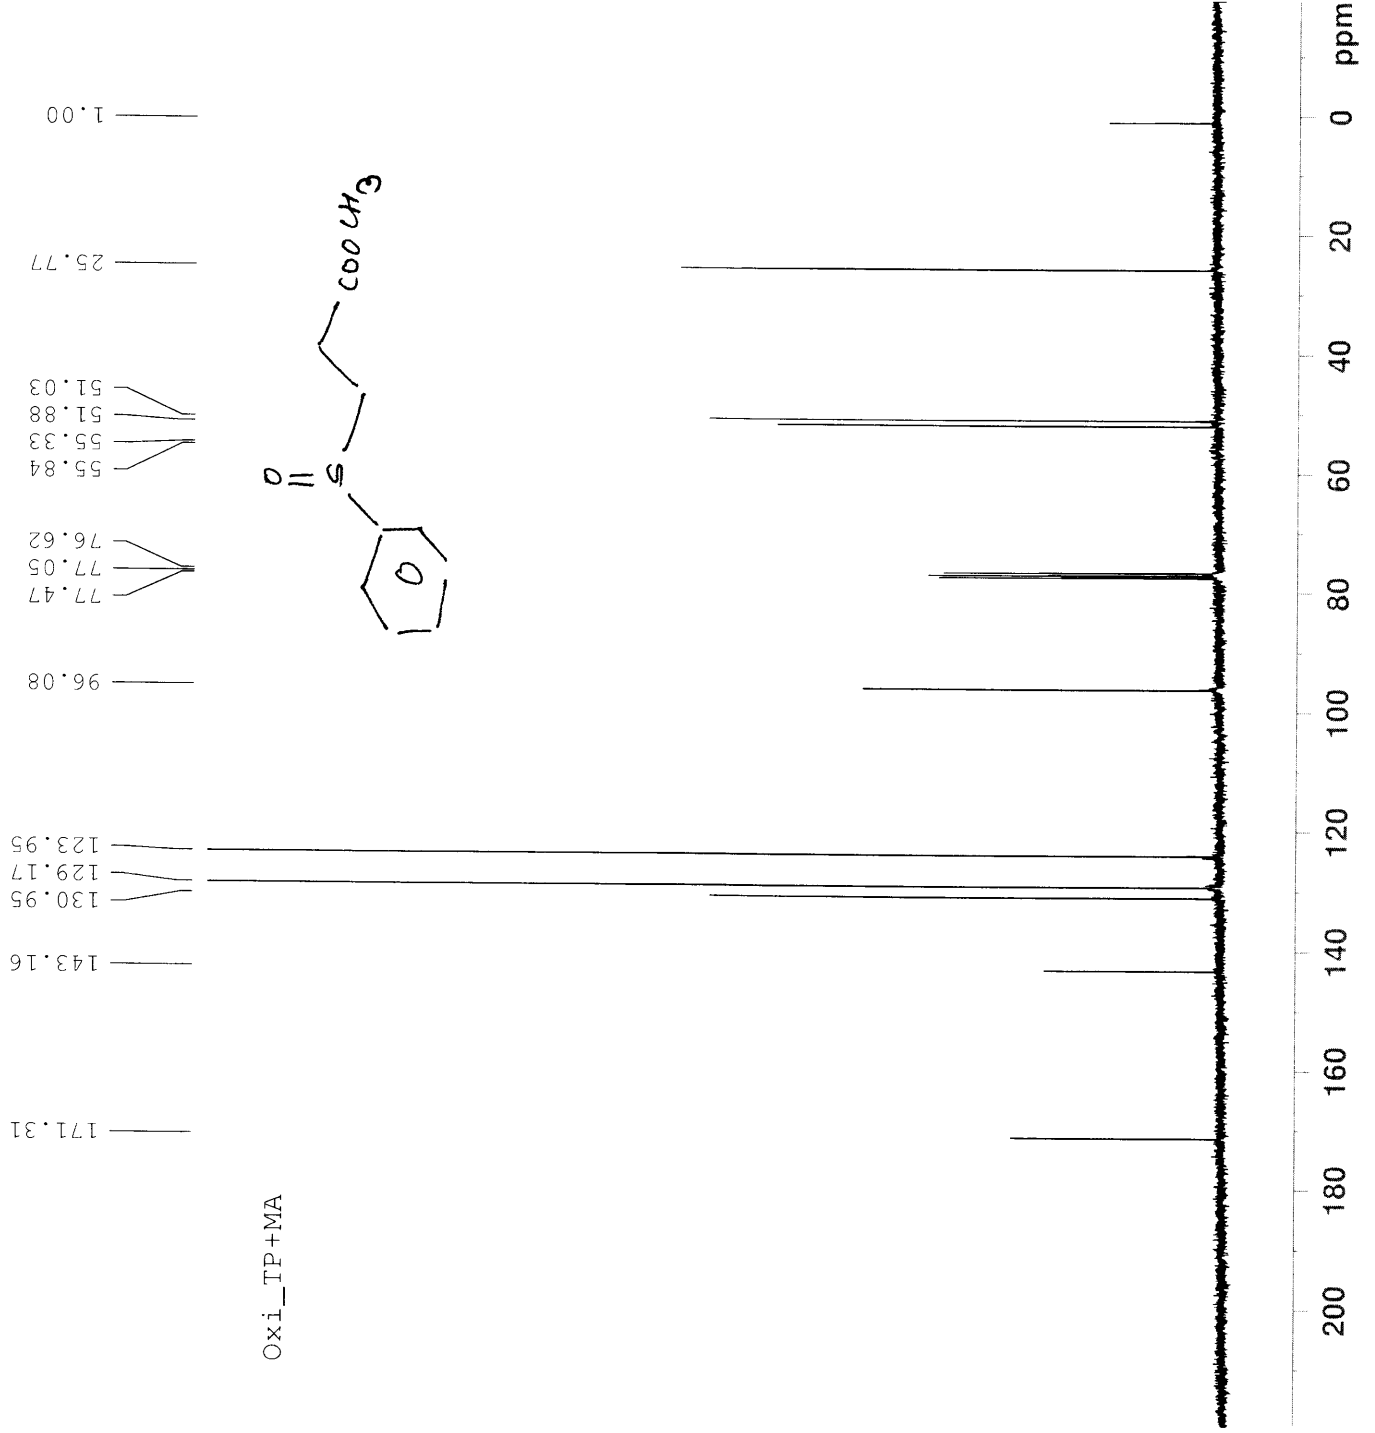

Oxi\_TP+MA

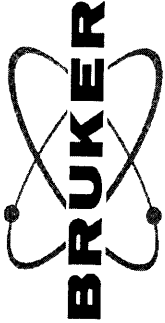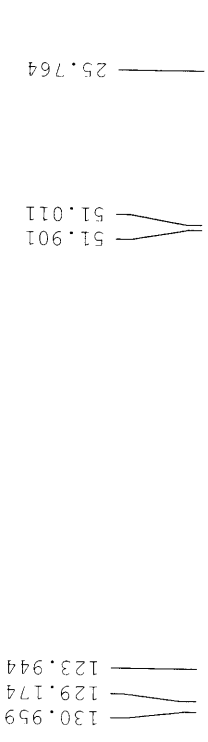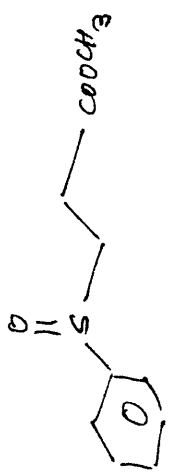

Current Data Parameters  
NAME MAK  
EXPNO 274  
PROCNO 1

F2 - Acquisition Parameters  
Date\_ 20110406  
Time 22.03  
INSTRUM spect  
PROBHD 5 mm BBO BB-1H  
PULPROG dept135  
TD 65536  
SOLVENT CDC13  
NS 740  
DS 8  
SWH 18115.941 Hz  
FIDRES 0.276427 Hz  
AQ 1.8088436 sec  
RG 2050  
DW 27.600 usec  
DE 6.00 usec  
TE 300.0 K  
CNS12 145.0000000  
D1 4.0000000 sec  
d12 0.00002000 sec  
d2 0.00344828 sec  
DELTA 0.00001178 sec  
TD0 1

==== CHANNEL f1 =====  
NUC1 13C  
P1 9.25 usec  
P2 18.50 usec  
PL1 -1.00 dB  
SFO1 75.4745411 MHz

==== CHANNEL f2 =====  
CPDPRG2 waitz16  
NUC2 1H  
P3 11.00 usec  
P4 22.00 usec  
PCPD2 80.00 usec  
PL2 17.00 dB  
PL2 0.00 dB  
SFO2 300.1315007 MHz

F2 - Processing parameters  
SI 32768  
SF 75.4677490 MHz  
WDW EM  
SSB 0  
LB 1.00 Hz  
GB 0  
PC 1.40

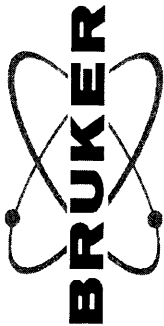

OXI-TP+MKV 0.2KBR

1.229  
1.201  
2.139  
2.158  
2.605  
2.619  
2.629  
2.646  
2.662  
2.676  
2.690  
2.707  
2.824  
2.841  
2.850  
2.868  
2.882  
2.895  
2.908  
2.924  
2.942  
2.951  
2.968  
2.981  
3.003  
3.029  
3.161  
3.182  
3.192  
3.205  
3.209  
3.226  
3.232  
3.250  
3.268  
7.268  
7.477  
7.487  
7.493  
7.501  
7.506  
7.512  
7.512  
7.523  
7.529  
7.537  
7.541  
7.551  
7.564  
7.572  
7.578  
7.585  
7.586  
7.597  
7.605

Current Data Parameters  
NAME MAK  
EXPNO 154  
PROCNO 1

F2 - Acquisition Parameters  
Date\_ 20100714  
Time 13.27  
INSTRUM spect  
PROBHD 5 mm BBO BB-1H  
PULPROG zg30  
TD 65536  
SOLVENT CDCl3  
NS 16  
DS 2  
SWH 6188.119 Hz  
FIDRES 0.094423 Hz  
AQ 5.2953587 sec  
RG 64  
DW 80.800 usec  
DE 6.00 usec  
TE 300.0 K  
D1 1.00000000 sec  
TD0 1

==== CHANNEL f1 =====  
NUC1 1H  
P1 11.00 usec  
PL1 0.00 dB  
SFO1 300.1318534 MHz

F2 - Processing parameters  
SI 32768  
SF 300.1300000 MHz  
WDW EM  
SSB 0  
LB 0.30 Hz  
GB 0  
PC 1.00

2.619  
2.629  
2.646  
2.662  
2.676  
2.690  
2.707  
2.924  
2.942  
2.951  
2.968  
2.981  
3.003  
3.029  
3.161  
3.182  
3.192  
3.205  
3.209  
3.226  
3.232  
3.250  
3.268  
7.268  
7.477  
7.487  
7.493  
7.501  
7.506  
7.512  
7.512  
7.523  
7.529  
7.537  
7.541  
7.551  
7.564  
7.572  
7.578  
7.585  
7.586  
7.597  
7.605

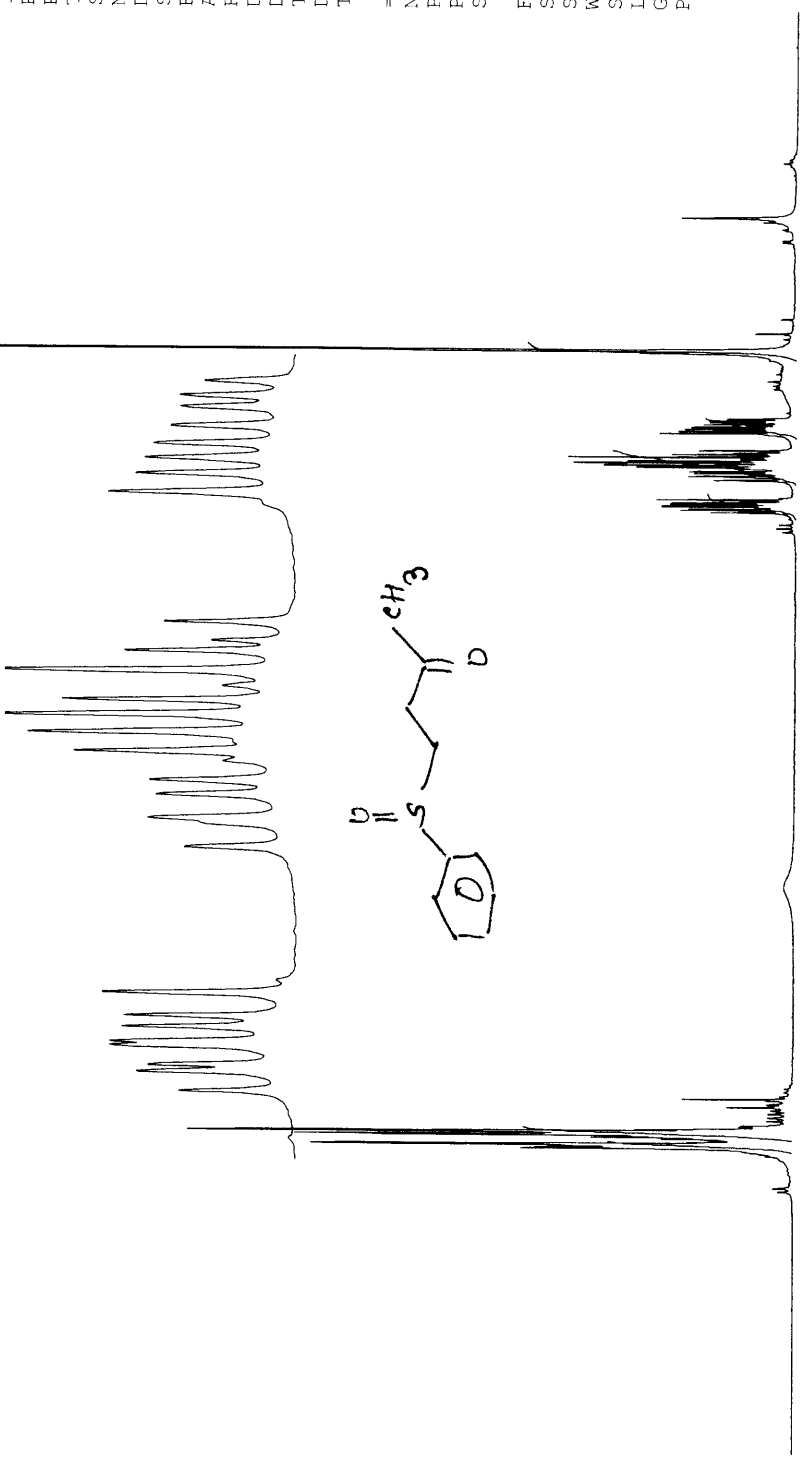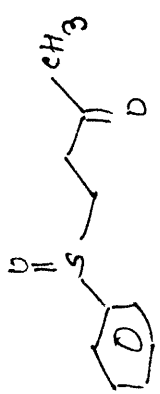

9.5 9.0 8.5 8.0 7.5 7.0 6.5 6.0 5.5 5.0 4.5 4.0 3.5 3.0 2.5 2.0 1.5 1.0 ppm

3.03  
1.03  
2.07  
1.00  
3.04  
2.09

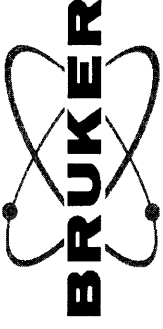

OXI-TP+MVK 0.2KBR

Current Data Parameters  
NAME MAK  
EXPNO 155  
PROCNO 1

F2 - Acquisition Parameters  
Date\_ 20100714  
Time 14.35  
INSTRUM spect  
PROBHD 5 mm BBO BB-1H  
PULPROG zgpg30  
TD 65536  
SOLVENT CDC13  
NS 1024  
DS 4  
SWH 18028.846 Hz  
FIDRES 0.275098 Hz  
AQ 1.8175818 sec  
RG 32800  
DW 27.733 usec  
DE 6.00 usec  
TE 300.0 K  
D1 2.00000000 sec  
d11 0.03000000 sec  
DELTA 1.89999998 sec  
TD0 1

==== CHANNEL f1 =====  
NUC1 13C  
P1 9.25 usec  
PL1 -1.00 dB  
SFO1 75.4752953 MHz

==== CHANNEL f2 =====  
CPDPRG2 waltz16  
NUC2 1H  
PCPD2 80.00 usec  
PL12 17.00 dB  
PL13 17.00 dB  
PL2 0.00 dB  
SFO2 300.1312005 MHz

F2 - Processing parameters  
SI 32768  
SF 75.4677490 MHz  
WDW EM  
SSB 0  
LB 1.00 Hz  
GB 0  
PC 1.40

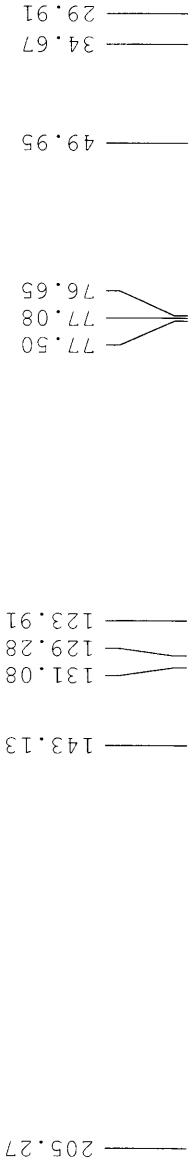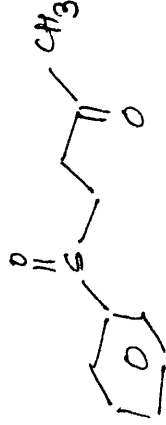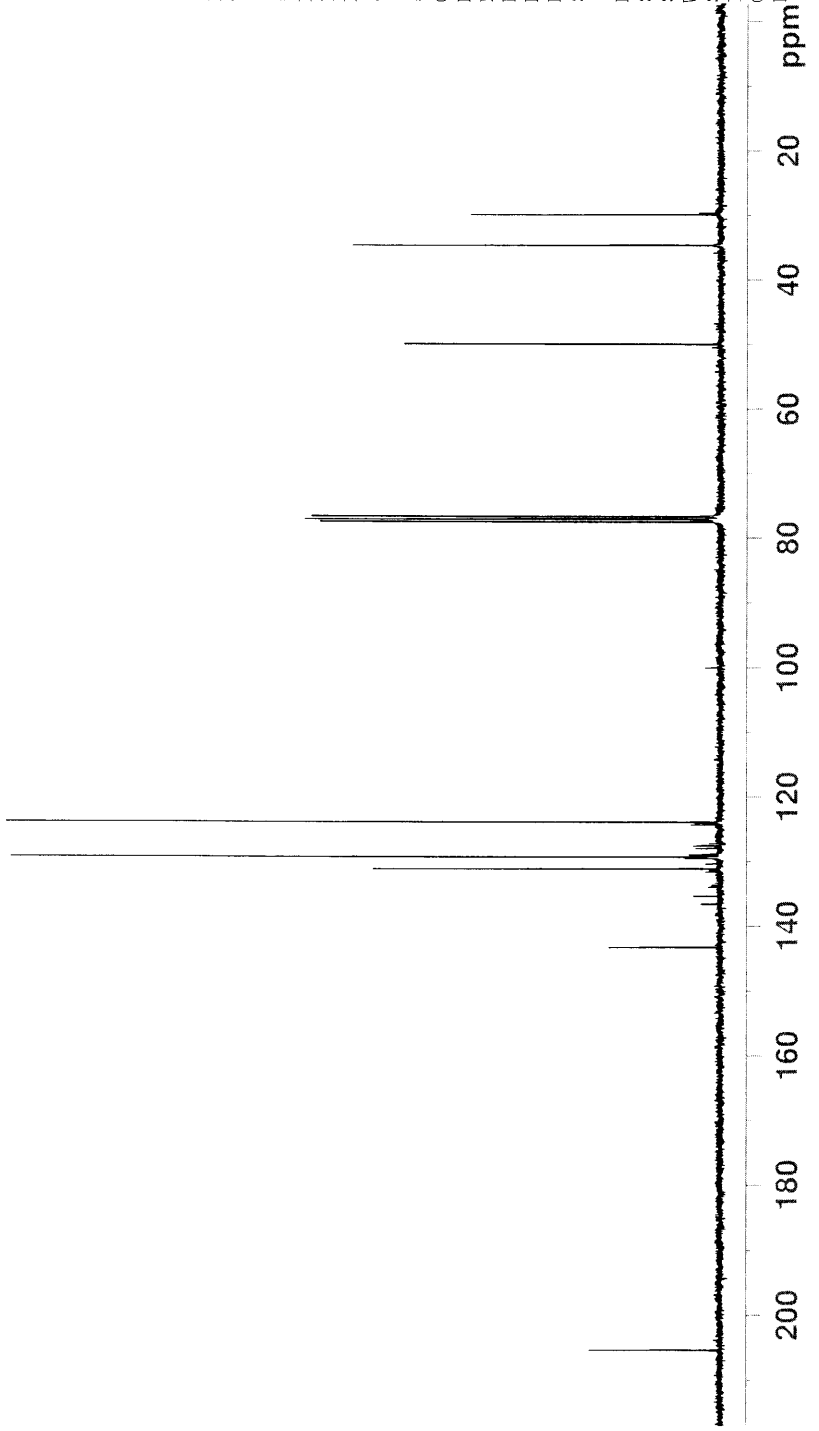



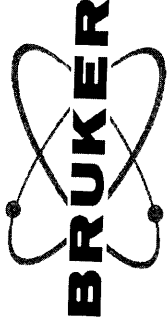

Current Data Parameters  
NAME MAK  
EXPNO 156  
PROCNO 1

F2 - Acquisition Parameters  
Date\_ 20100714  
Time 15.44  
INSTRUM spect  
PROBHD 5 mm BBO BB-IH  
PULPROG dept135  
TD 65536  
SOLVENT CDC13  
NS 1644  
DS 8  
SWH 18115.941 Hz  
FIDRES 0.276427 Hz  
AQ 1.8088436 sec  
RG 2050  
DW 27.600 usec  
DE 6.00 usec  
TE 300.0 K  
CNST2 145.0000000  
d1 4.0000000 sec  
d12 0.0002000 sec  
d2 0.00344828 sec  
DELTA 0.00001178 sec  
TD0 1

==== CHANNEL f1 =====  
NUC1 13C  
P1 9.25 usec  
P2 18.50 usec  
PL1 -1.00 dB  
SFO1 75.4745411 MHz

==== CHANNEL f2 =====  
CPDPRG2 waltz16  
NUC2 1H  
P3 11.00 usec  
P4 22.00 usec  
PCPD2 80.00 usec  
PL12 17.00 dB  
PL2 0.00 dB  
SFO2 300.1315007 MHz

F2 - Processing parameters  
SI 32768  
SF 75.4677490 MHz  
WDW EM  
SSB 0  
LB 1.00 Hz  
GB 0  
PC 1.40

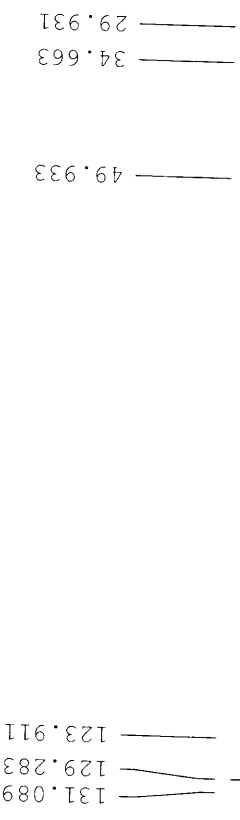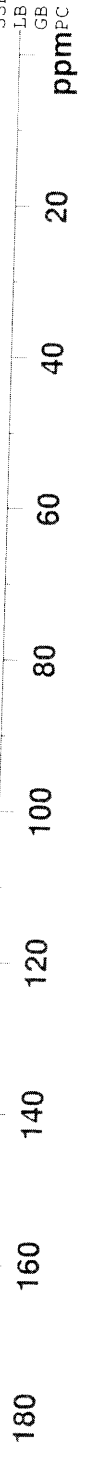

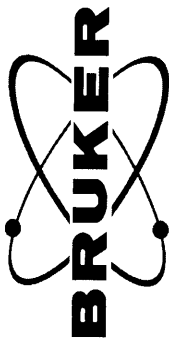

Current Data Parameters  
 NAME DNP  
 EXPNO 149  
 PROCNO 1

F2 - Acquisition Parameters  
 Date\_ 20131112  
 Time\_ 13.27  
 INSTRUM spect  
 PROBHD 5 mm BBO BB-1H  
 PULPROG zg30  
 TD 65536  
 SOLVENT CDCl3  
 NS 16  
 DS 2  
 SWH 6188.119 Hz  
 FIDRES 0.094423 Hz  
 AQ 5.2953587 sec  
 RG 16  
 DW 80.800 usec  
 DE 6.00 usec  
 TE 300.0 K  
 D1 1.00000000 sec  
 TD0 1

==== CHANNEL f1 =====  
 NUC1 1H  
 P1 11.38 usec  
 PL1 0.00 dB  
 SFO1 300.1318534 MHz

F2 - Processing parameters  
 SI 32768  
 SF 300.1300000 MHz  
 WDW EM  
 SSB 0  
 LB 0.30 Hz  
 GB 0  
 PC 1.00

2.473  
2.457  
2.447  
2.431  
2.415  
2.405  
2.388  
1.987  
1.291  
1.275  
1.267  
1.259  
1.252  
1.236  
1.207  
1.002  
0.987  
0.980  
0.961  
0.954  
0.935  
0.926  
0.901

7.634  
7.609  
7.586  
7.561  
7.523  
7.497  
7.473  
7.456  
7.450

7.851  
7.826  
7.634  
7.609  
7.586  
7.561  
7.523  
7.497  
7.473  
7.456  
7.450

MAM-Cyclo propanyl

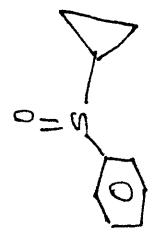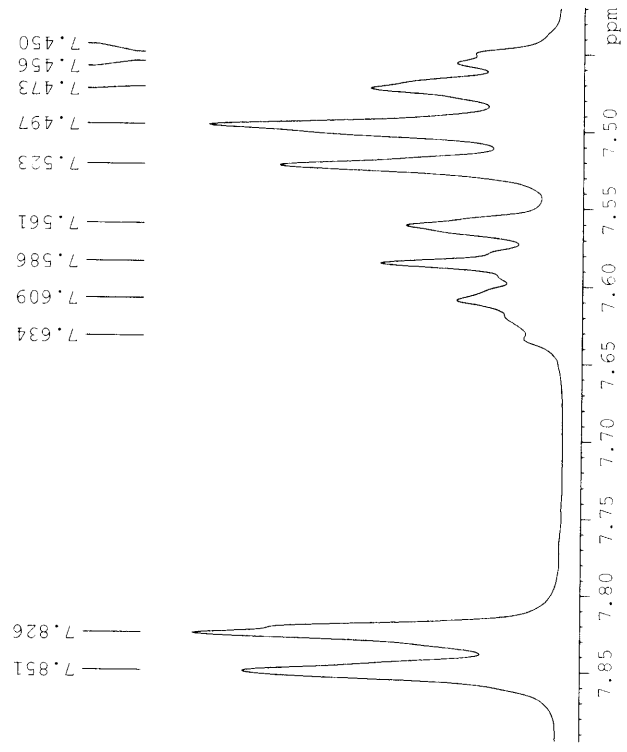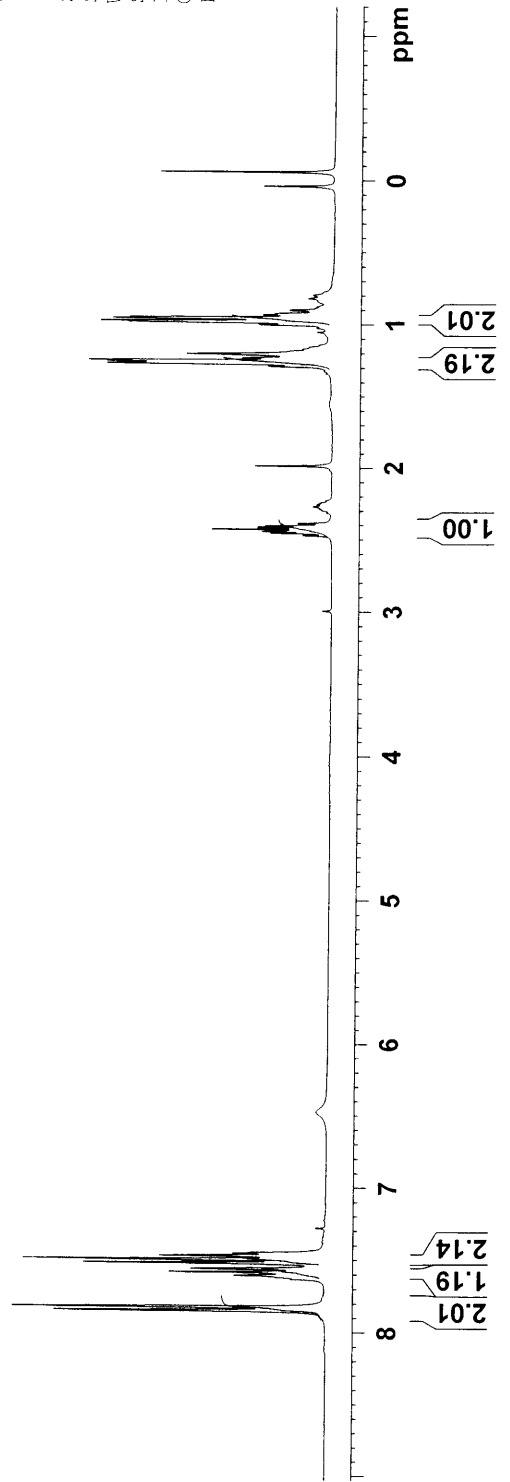

MAM-Cyclo Propanyl

140.63  
133.88  
131.17  
129.23  
127.43  
124.14

32.82  
5.91

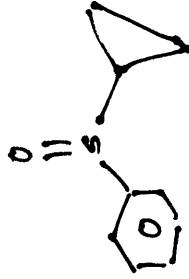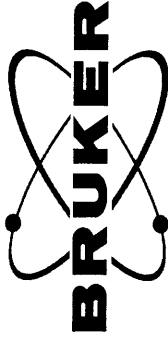

Current Data Parameters  
NAME DNP  
EXPNO 150  
PROCNO 1

F2 - Acquisition Parameters  
Date\_ 20131112  
Time 14.51  
INSTRUM spect  
PROBHD 5 mm BBO BB-1H  
PULPROG zgpg30  
TD 65536  
SOLVENT CDCl3  
NS 1158  
DS 4  
SWH 18028.846 Hz  
FIDRES 0.275098 Hz  
AQ 1.8175818 sec  
RG 32800  
DW 27.733 usec  
DE 6.00 usec  
TE 300.0 K  
D1 2.0000000 sec  
d11 0.0300000 sec  
DELTA 1.89999998 sec  
TD0 1

==== CHANNEL f1 =====  
NUC1 13C  
P1 9.25 usec  
PL1 -1.00 dB  
SFO1 75.4752953 MHz

==== CHANNEL f2 =====  
CPDPRG2 waltz16  
NUC2 1H  
PCPD2 80.00 usec  
PL12 16.94 dB  
PL13 16.94 dB  
PL2 0.00 dB  
SFO2 300.1312005 MHz

F2 - Processing parameters  
SI 32768  
SF 75.4677490 MHz  
WDW EM  
SSB 0  
LB 1.00 Hz  
GB 0  
PC 1.40

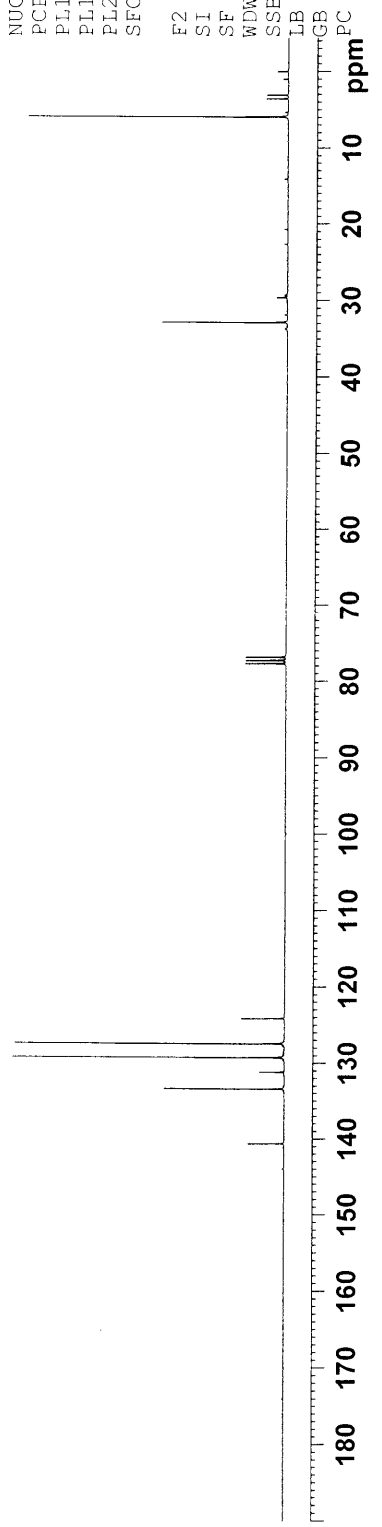

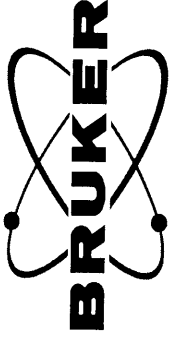

Current Data Parameters  
NAME DNP  
EXPNO 151  
PROCNO 1

F2 - Acquisition Parameters  
Date\_ 20131112  
Time 20.35  
INSTRUM spect  
PROBHD 5 mm BBO BB-1H  
PULPROG dept135  
TD 65536  
SOLVENT CDCl3  
NS 3500  
DS 8  
SWH 18115.941 Hz  
FIDRES 0.276427 Hz  
AQ 1.8088436 sec  
RG 2050  
DW 27.600 usec  
DE 6.00 usec  
TE 300.0 K  
CNST2 145.0000000  
D1 4.00000000 sec  
d12 0.0002000 sec  
d2 0.00344828 sec  
DELTA 0.00001178 sec  
TDO 1

==== CHANNEL f1 =====  
NUC1 13C  
P1 9.25 usec  
P2 18.50 usec  
PL1 -1.00 dB  
SFO1 75.4745411 MHz

==== CHANNEL f2 =====  
CPDPRG2 waltz16  
NUC2 1H  
P3 11.38 usec  
P4 22.76 usec  
PCPD2 80.00 usec  
PL12 16.94 dB  
PL2 0.00 dB  
SFO2 300.1315007 MHz

F2 - Processing parameters  
SI 32768  
SF 75.4677490 MHz  
WDW EM  
SSB 0  
LB 1.00 Hz  
GB 0  
PC 1.40

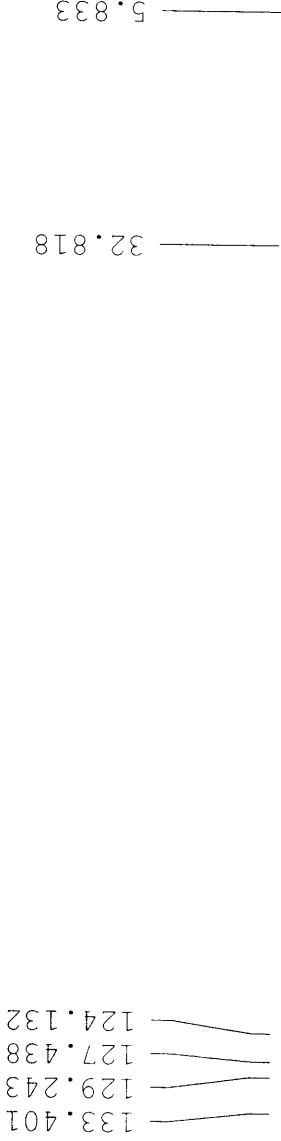

MAM-Cyclo Propanyl

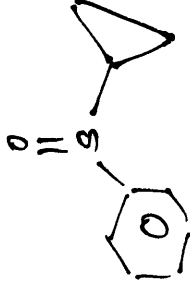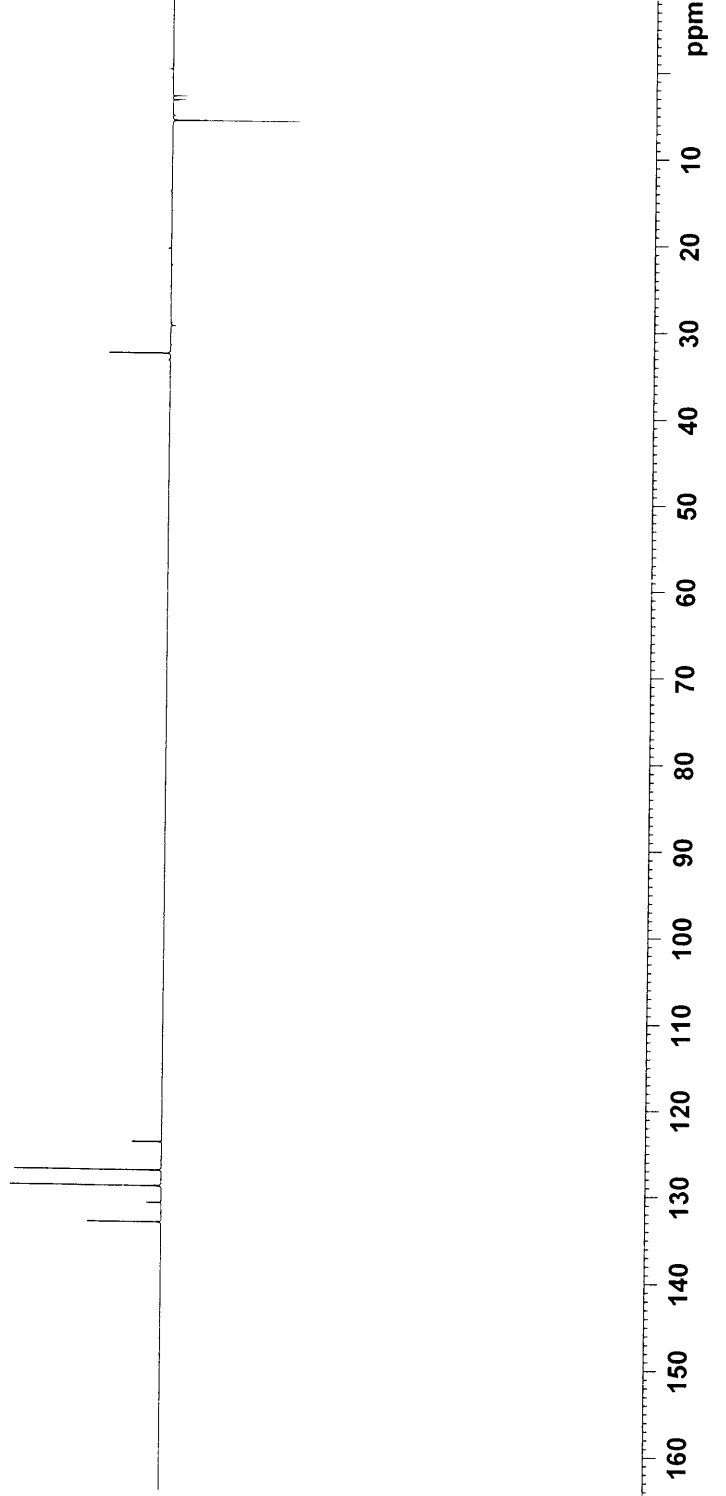

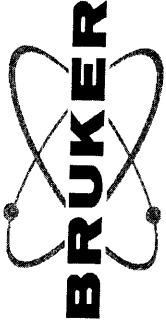

Current Data Parameters  
NAME NAK  
EXPNO 279  
PROCNO 1

F2 - Acquisition Parameters  
Date\_ 20110409  
Time 22.01  
INSTRUM spect  
PROBHD 5 mm BBO BB-1H  
PULPROG zg30  
TD 65536  
SOLVENT CDCl3  
NS 16  
DS 2  
SWH 6188.119 Hz  
FIDRES 0.094423 Hz  
AQ 5.2953587 sec  
RG 57  
DW 80.800 usec  
DE 6.00 usec  
TE 300.0 K  
D1 1.00000000 sec  
TD0 1

==== CHANNEL f1 =====  
NUC1 1H  
P1 11.00 usec  
PL1 0.00 dB  
SFO1 300.1318534 MHz

F2 - Processing parameters  
SI 32768  
SF 300.1300000 MHz  
WDW EM  
SSB 0  
LB 0.30 Hz  
GB 0  
PC 1.00

5.896  
5.873  
5.864  
5.847  
5.840  
5.816  
5.792  
5.783  
5.401  
5.381  
5.367  
5.352  
5.295  
3.487  
3.464  
3.444  
3.419  
3.356  
3.331  
3.314  
3.288

Diallyl Sulfoxide

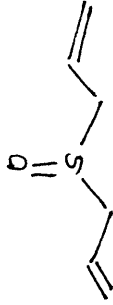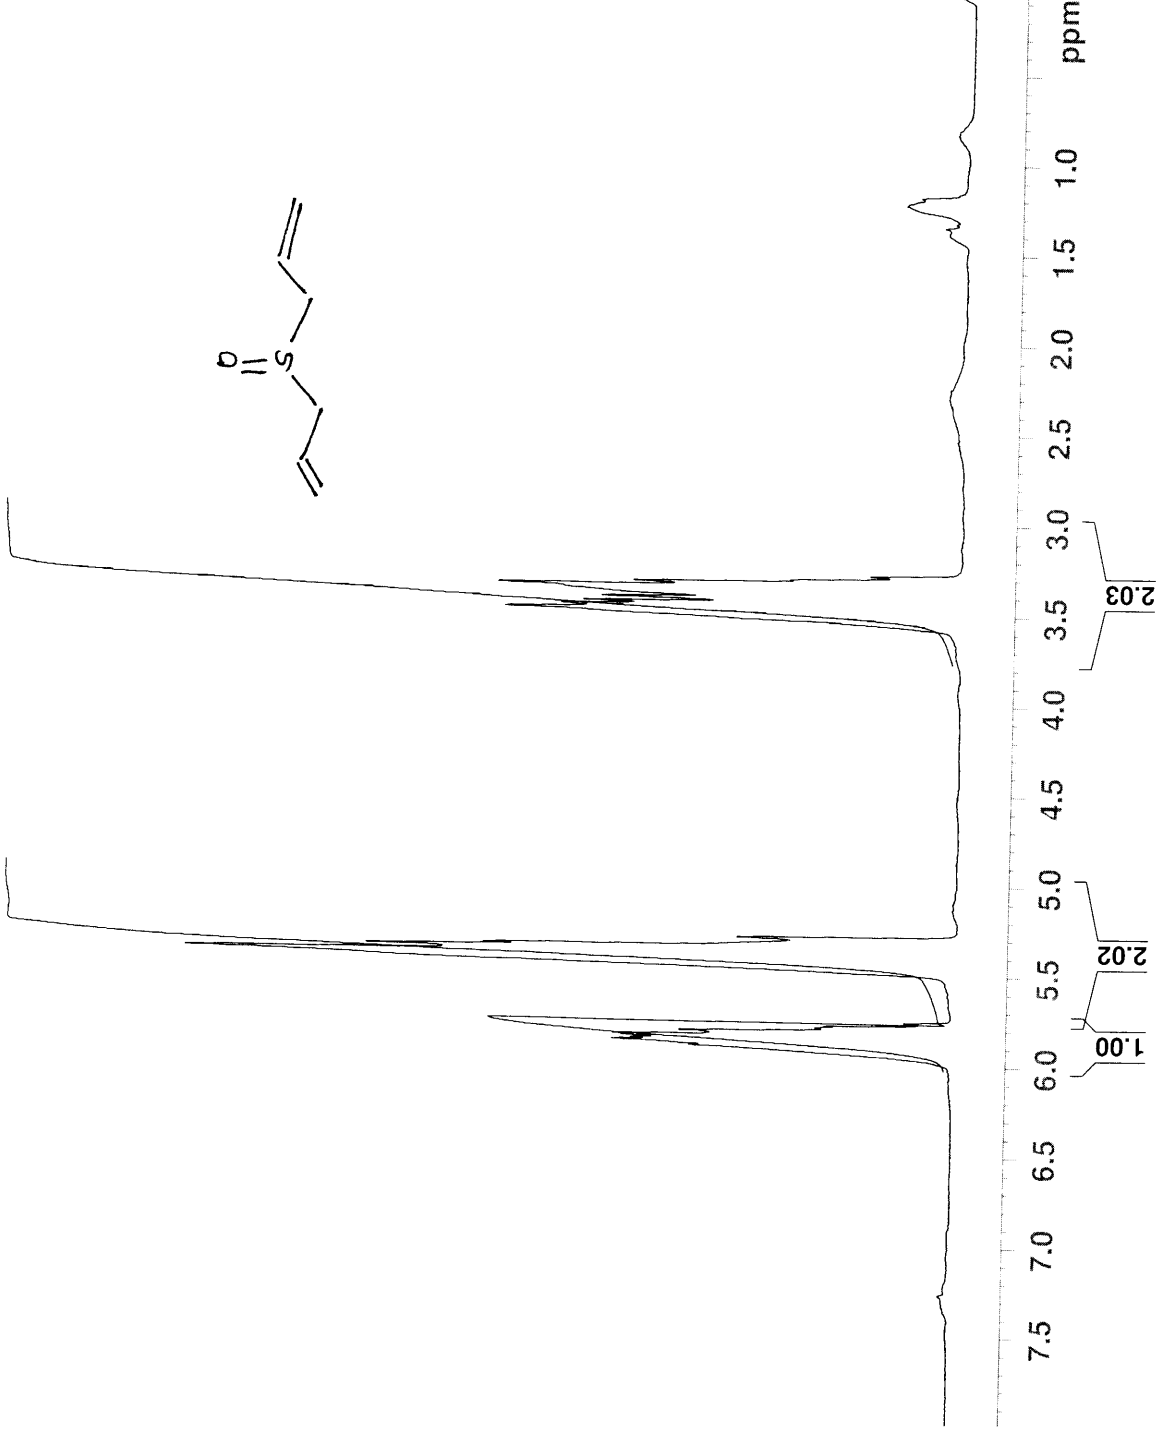

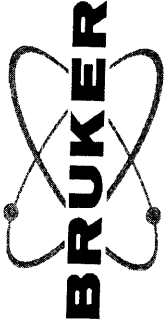

Current Data Parameters  
NAME MAK  
EXPNO 279  
PROCNO 1

F2 - Acquisition Parameters  
Date\_ 20110409  
Time 22.01  
INSTRUM spect  
PROBHD 5 mm BBO BB-1H  
PULPROG zg30  
TD 65536  
SOLVENT CDC13  
NS 16  
DS 2  
SWH 6188.119 Hz  
FIDRES 0.094423 Hz  
AQ 5.2953587 sec  
RG 57  
DW 80.800 usec  
DE 6.00 usec  
TE 300.0 K  
D1 1.00000000 sec  
TD0 1

==== CHANNEL f1 =====  
NUC1 1H  
P1 11.00 usec  
PL1 0.00 dB  
SFO1 300.1318534 MHz

F2 - Processing parameters  
SI 32768  
SF 300.1300000 MHz  
WDW EM  
SSB 0  
LB 0.30 Hz  
GB 0  
PC 1.00

3.487  
3.464  
3.444  
3.419  
3.356  
3.331  
3.314  
3.288

5.896  
5.873  
5.864  
5.847  
5.840  
5.816  
5.792  
5.783  
5.401  
5.381  
5.367  
5.352  
5.295

Diallyl Sulfoxide

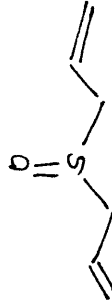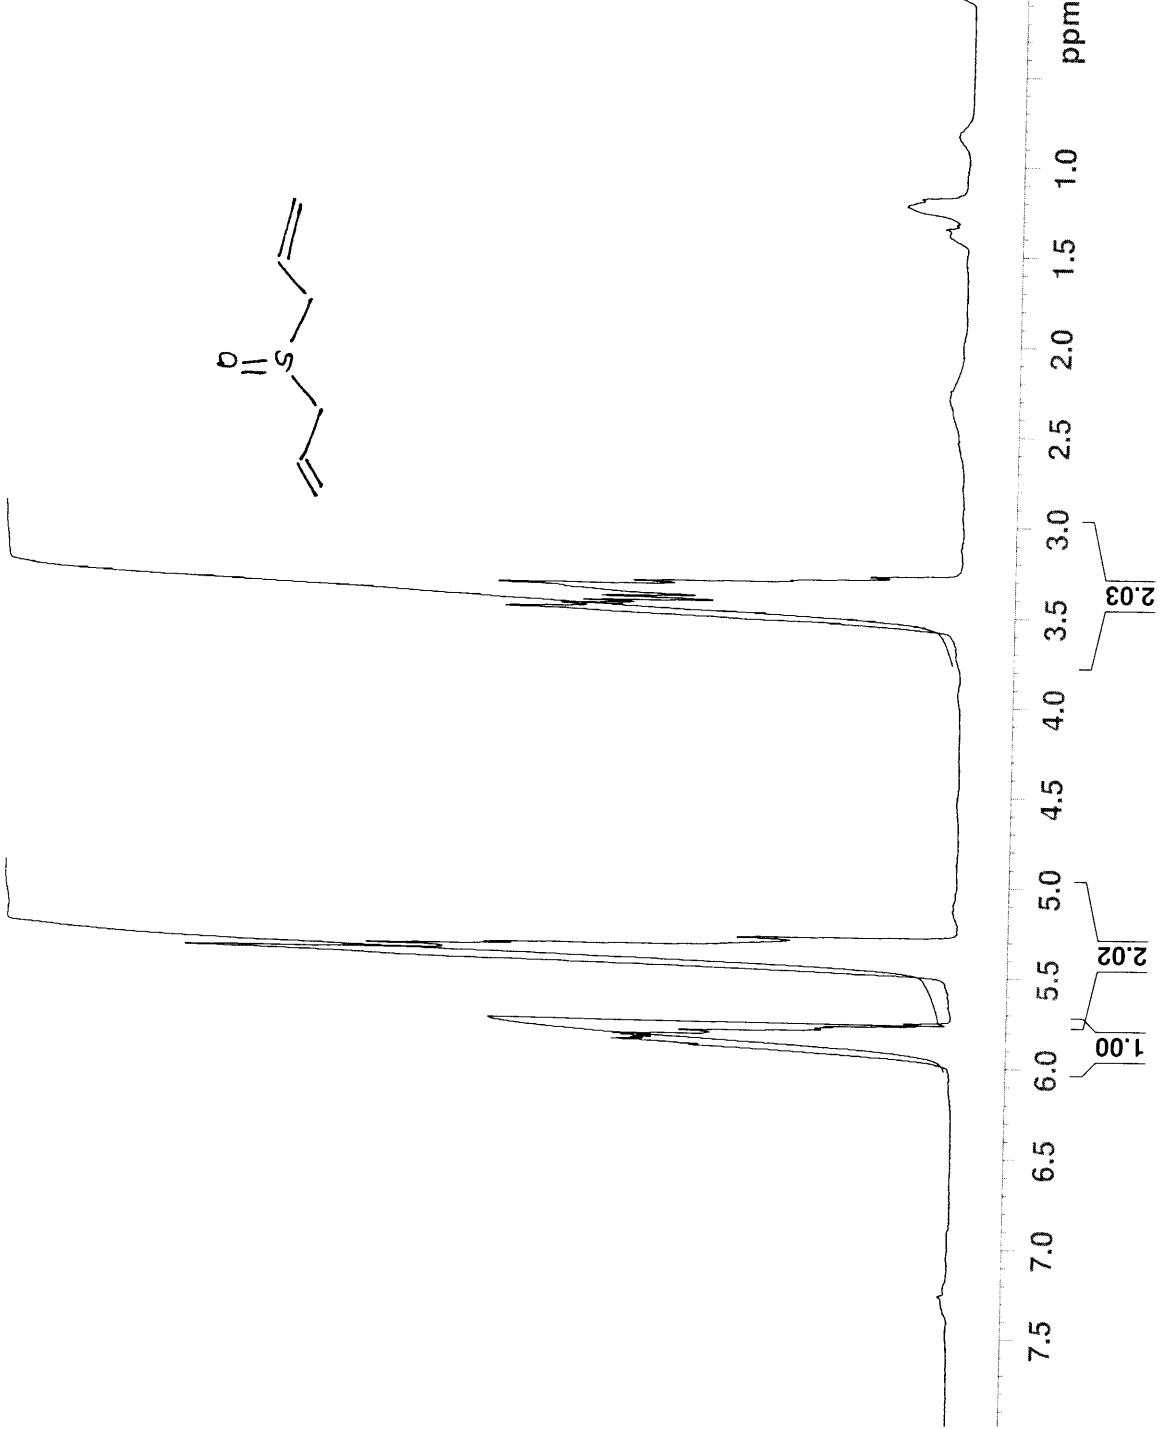

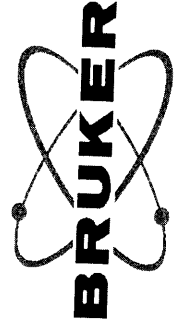

Diallyl Sulfoxide

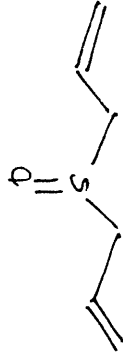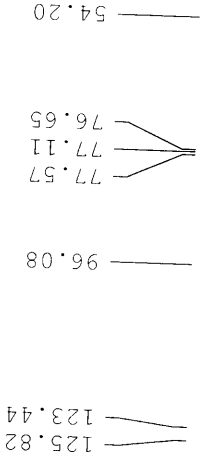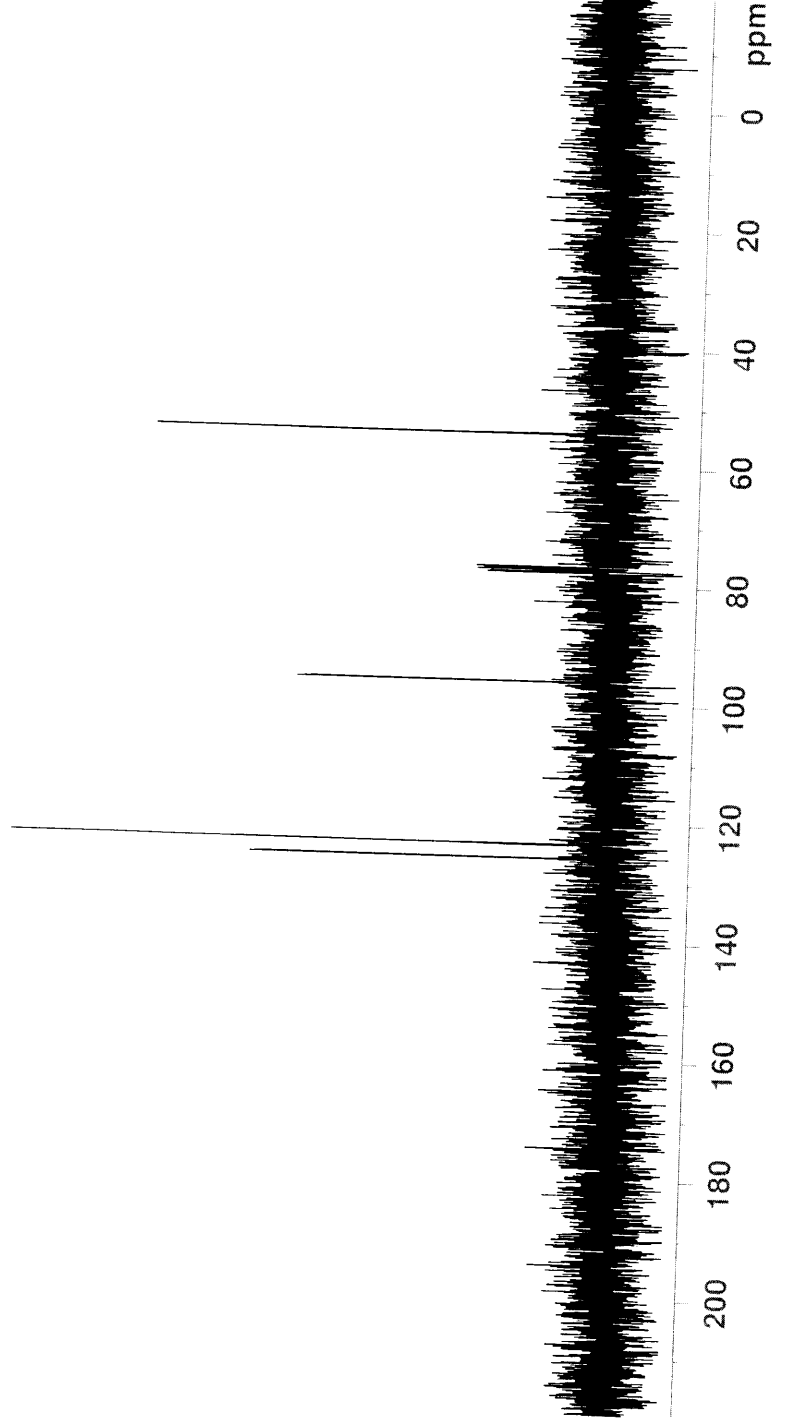

Current Data Parameters  
NAME MAK  
EXPNO 281  
PROCNO 1

F2 - Acquisition Parameters  
Date\_ 20110409  
Time 22.16  
INSTRUM spect  
PROBHD 5 mm BBO BB-1H  
PULPROG zgpg30  
TD 65536  
SOLVENT CDCl3  
NS 2500  
DS 4  
SWH 18028.846 Hz  
FIDRES 0.275098 Hz  
AQ 1.8175818 sec  
RG 32800  
DE 27.733 usec  
TE 6.00 usec  
D1 300.0 K  
d11 2.0000000 sec  
DELTA 0.0300000 sec  
DELTA 1.89999998 sec  
TD0 1

==== CHANNEL f1 =====  
NUC1 13C  
P1 9.25 usec  
PL1 -1.00 dB  
SF01 75.4752953 MHz

==== CHANNEL f2 =====  
CPDPRG2 waltz16  
NUC2 1H  
PCPD2 80.00 usec  
PL12 17.00 dB  
PL13 17.00 dB  
PL2 0.00 dB  
SF02 300.1312005 MHz

F2 - Processing parameters  
SI 32768  
SF 75.4677490 MHz  
WDW EM  
SSB 0  
LB 1.00 Hz  
GB 0  
PC 1.40

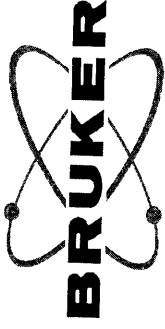

Diallyl Sulfoxide

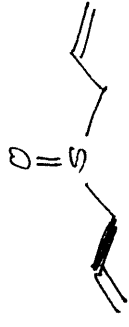

125.843  
123.450

54.213

Current Data Parameters  
NAME MAK  
EXPNO 280  
PROCNO 1

F2 - Acquisition Parameters  
Date\_ 20110409  
Time 22.04  
INSTRUM spect  
PROBHD 5 mm BBO BB-1H  
PULPROG dephl35  
TD 65536  
SOLVENT CDCl3  
NS 98  
DS 8  
SWH 18115.941 Hz  
FIDRES 0.276427 Hz  
AQ 1.8088436 sec  
RG 2050  
DW 27.600 usec  
DE 6.00 usec  
TE 300.0 K  
CNST2 145.0000000  
D1 4.0000000 sec  
d12 0.00002000 sec  
d2 0.0034828 sec  
DELTA 0.00001178 sec  
TD0 1

==== CHANNEL f1 =====  
NUC1 13C  
P1 9.25 usec  
P2 18.50 usec  
PL1 -1.00 dB  
SFO1 75.4745411 MHz

==== CHANNEL f2 =====  
CPDPRG2 waltz16  
NUC2 1H  
P3 11.00 usec  
P4 22.00 usec  
PCPD2 80.00 usec  
PL12 17.00 dB  
PL2 0.00 dB  
SFO2 300.1315007 MHz

F2 - Processing parameters  
SI 32768  
SF 75.4677490 MHz  
WDW EM  
SSB 0  
LB 1.00 Hz  
GB 0  
PC 1.40

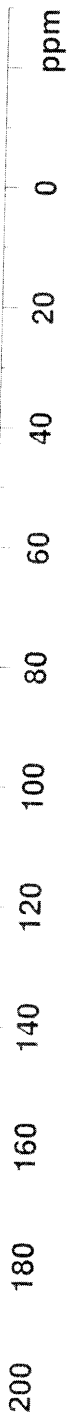



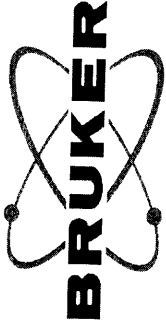

Current Data Parameters  
 NAME MAK  
 EXPNO 266  
 PROCNO 1

F2 - Acquisition Parameters

Date\_ 20110329  
 Time 19.23  
 INSTRUM spect  
 PROBHD 5 mm BBO BB-1H  
 PULPROG zg30  
 TD 65536  
 SOLVENT CDC13  
 NS 16  
 DS 2  
 SWH 6188.119 Hz  
 FIDRES 0.094423 Hz  
 AQ 5.2953587 sec  
 RG 40.3  
 DW 80.800 usec  
 DE 6.00 usec  
 TE 300.0 K  
 D1 1.00000000 sec  
 TD0 1

==== CHANNEL f1 =====

NUC1 1H  
 P1 11.00 usec  
 PL1 0.00 dB  
 SFO1 300.1318534 MHz

F2 - Processing parameters

SI 32768  
 SF 300.1300000 MHz  
 WDW EM  
 SSB 0  
 LB 0.30 Hz  
 GB 0  
 PC 1.00

7.584  
7.580  
7.578  
7.570  
7.563  
7.558  
7.553  
7.356  
7.338  
7.330  
7.321

DP\_Sulfoxide

7.584  
7.580  
7.578  
7.570  
7.563  
7.558  
7.553  
7.356  
7.338  
7.330  
7.321

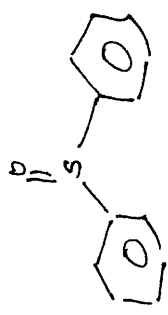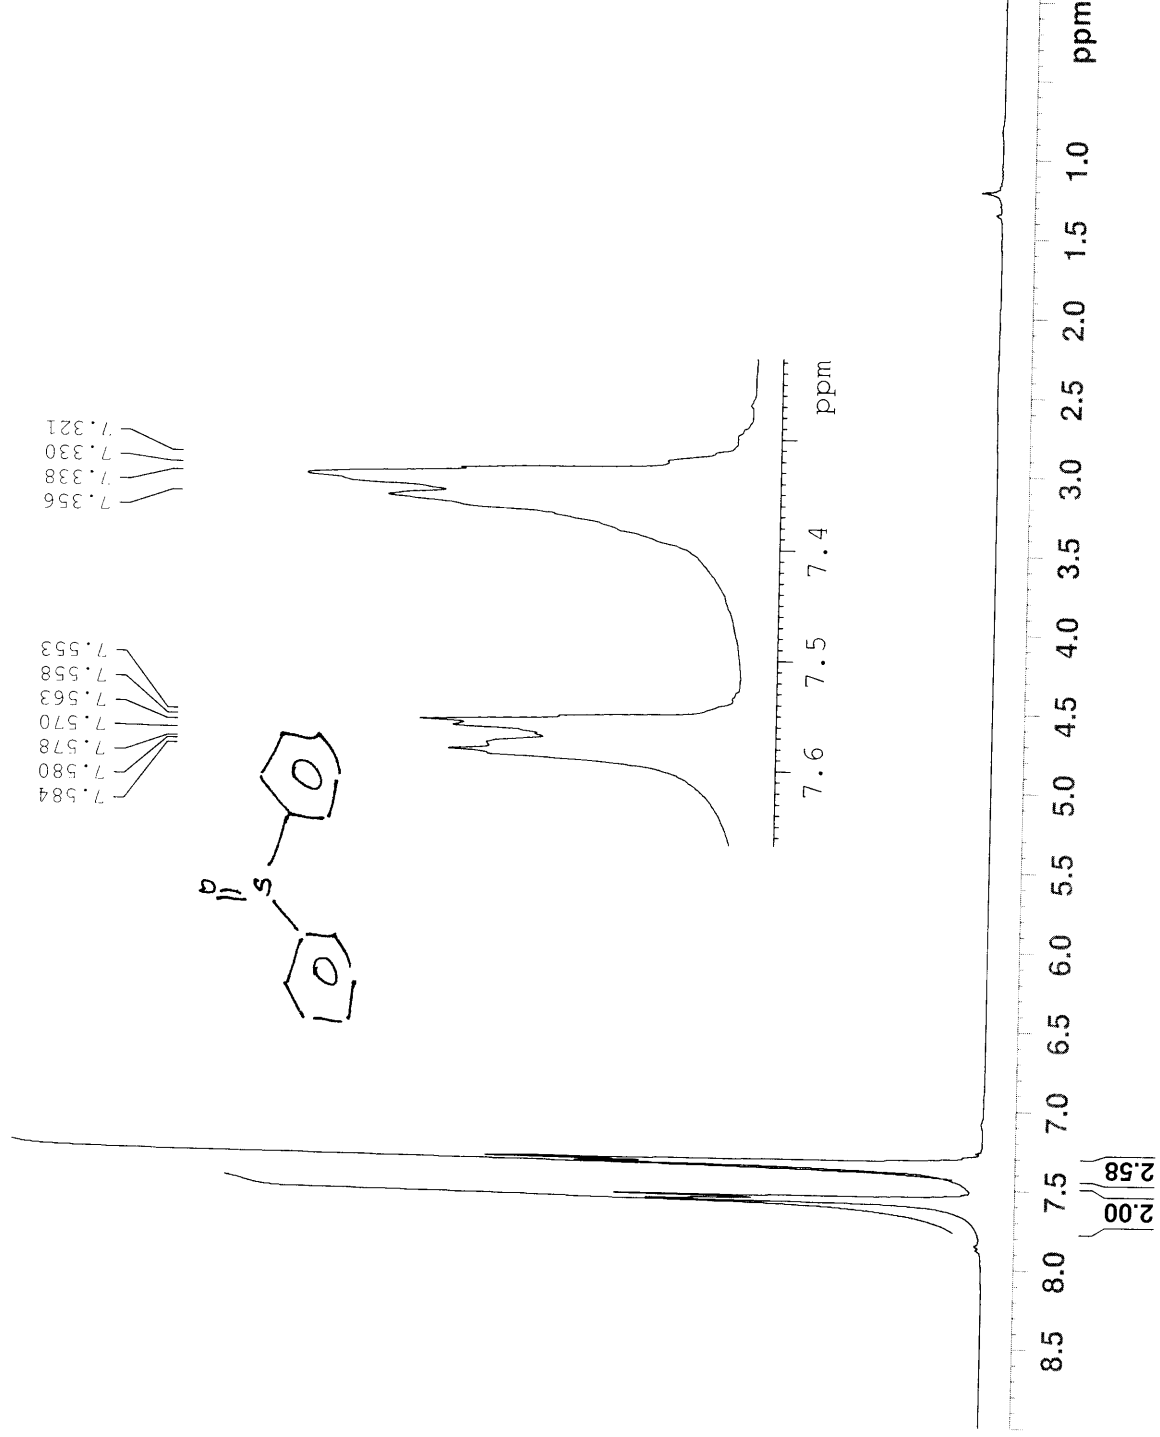

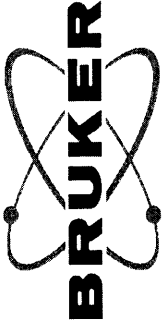

DP\_Sulfoxide

Current Data Parameters  
NAME MAK  
EXPNO 267  
PROCNO 1

F2 - Acquisition Parameters

Date\_ 20110329  
Time 19.26  
INSTRUM spect  
PROBHD 5 mm BBO BB-1H  
PULPROG zgpg30  
TD 65536  
SOLVENT CDCl3  
NS 1816  
DS 4  
SWH 18028.846 Hz  
FIDRES 0.275098 Hz  
AQ 1.8175818 sec  
RG 32800  
DW 27.733 usec  
DE 6.00 usec  
TE 300.0 K  
D1 2.00000000 sec  
d11 0.03000000 sec  
DELTA 1.89999998 sec  
TD0 1

==== CHANNEL f1 =====  
NUC1 13C  
P1 9.25 usec  
PL1 -1.00 dB  
SFO1 75.4752953 MHz

==== CHANNEL f2 =====  
CPDPRG2 waltz16  
NUC2 1H  
PCPD2 80.00 usec  
PL12 17.00 dB  
PL13 17.00 dB  
PL2 0.00 dB  
SFO2 300.1312005 MHz

F2 - Processing parameters  
SI 32768  
SF 75.4677490 MHz  
WDW EM  
SSB 0  
LB 1.00 Hz  
GB 0  
PC 1.40

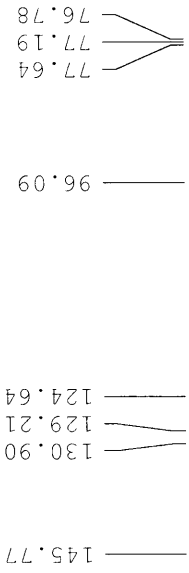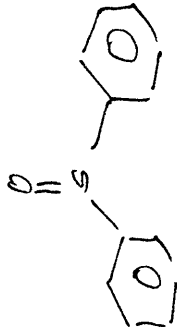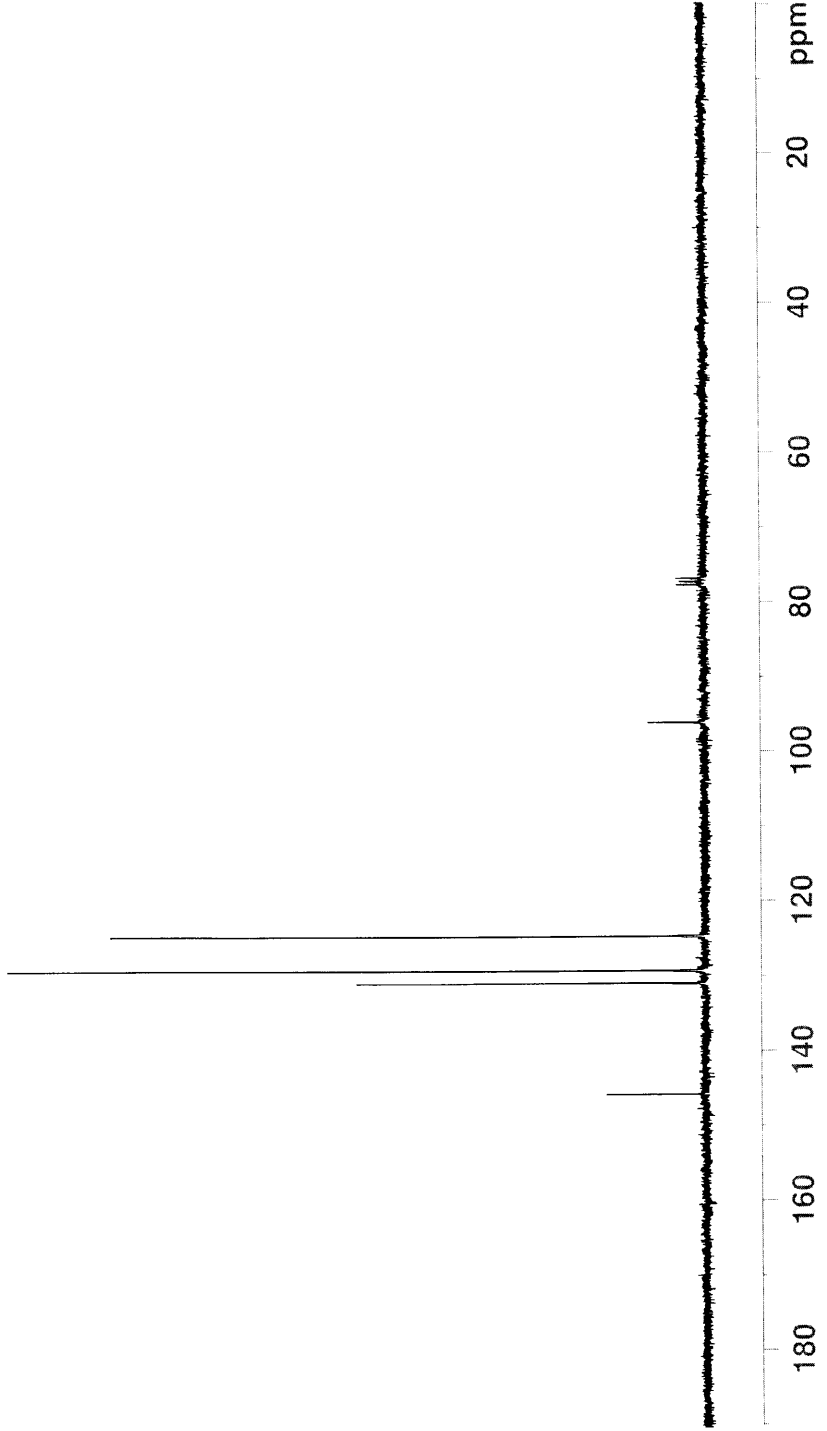

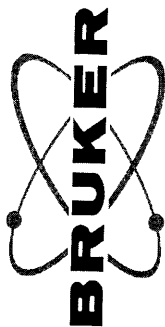

DP\_Sulfoxide

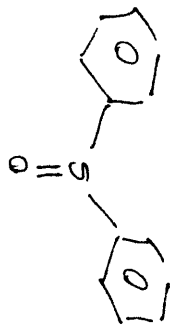

130.905  
129.213  
124.642

Current Data Parameters  
NAME MAK  
EXPNO 268  
PROCNO 1

F2 - Acquisition Parameters  
Date\_ 20110329  
Time 21.24  
INSTRUM spect  
PROBHD 5 mm BBO BB-1H  
PULPROG dept135  
TD 65536  
SOLVENT CDC13  
NS 1348  
DS 8  
SWH 18115.941 Hz  
FIDRES 0.276427 Hz  
AQ 1.8088436 sec  
RG 2050  
DW 27.600 usec  
DE 6.00 usec  
TE 300.0 K  
CNST2 145.0000000  
d1 4.0000000 sec  
d12 0.00002000 sec  
d2 0.00344828 sec  
DELTA 0.00001178 sec  
TD0 1

==== CHANNEL f1 =====  
NUC1 13C  
P1 9.25 usec  
P2 18.50 usec  
PL1 -1.00 dB  
SFO1 75.4745411 MHz

==== CHANNEL f2 =====  
CPDPRG2 waltz16  
NUC2 1H  
P3 11.00 usec  
P4 22.00 usec  
PCPD2 80.00 usec  
PL12 17.00 dB  
PL2 0.00 dB  
SFO2 300.1315007 MHz

F2 - Processing parameters  
SI 32768  
SF 75.4677490 MHz  
WDW EM  
SSB 0  
LB 1.00 Hz  
GB 0  
PC 1.40

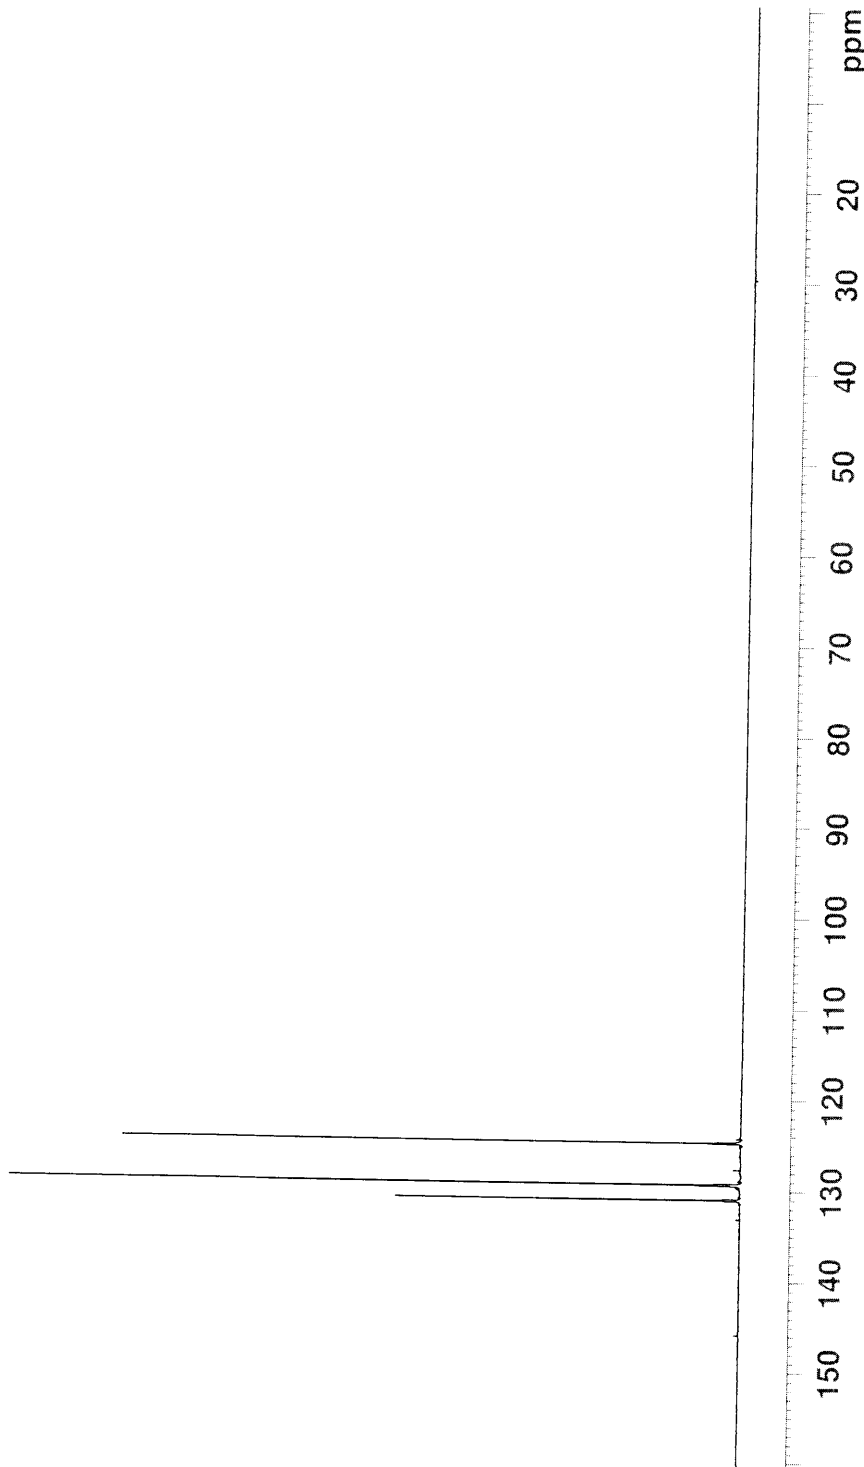

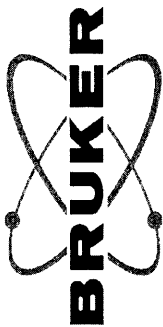

Current Data Parameters  
NAME MAK  
EXPNO 251  
PROCNO 1

F2 - Acquisition Parameters  
Date\_ 20110325  
Time 10.52  
INSTRUM spect  
PROBHD 5 mm BBO BB-1H  
PULPROG zg30  
TD 65536  
SOLVENT CDCl3  
NS 16  
DS 2  
SWH 6188.119 Hz  
FIDRES 0.094423 Hz  
AQ 5.2953587 sec  
RG 256  
DW 80.800 usec  
DE 6.00 usec  
TE 300.0 K  
D1 1.00000000 sec  
TD0 1

==== CHANNEL f1 =====  
NUC1 1H  
P1 11.00 usec  
PL1 0.00 dB  
SFO1 300.1318534 MHz

F2 - Processing parameters  
SI 32768  
SF 300.1300000 MHz  
WDW EM  
SSB 0  
LB 0.30 Hz  
GB 0  
PC 1.00

1.727  
1.524  
1.434  
1.421  
1.343  
1.299  
1.263  
1.171  
1.135

4.112  
4.070  
4.006  
3.964

7.410  
7.405  
7.399  
7.391  
7.382  
7.378  
7.373  
7.363  
7.357  
7.350  
7.312  
7.306  
7.289  
7.285  
7.266  
7.260  
7.241  
7.227  
7.221  
7.211  
6.989  
6.984  
6.965  
6.958  
6.691

Oxi\_Bz.Ph.Sulfoxide

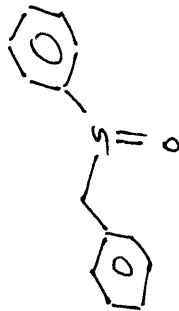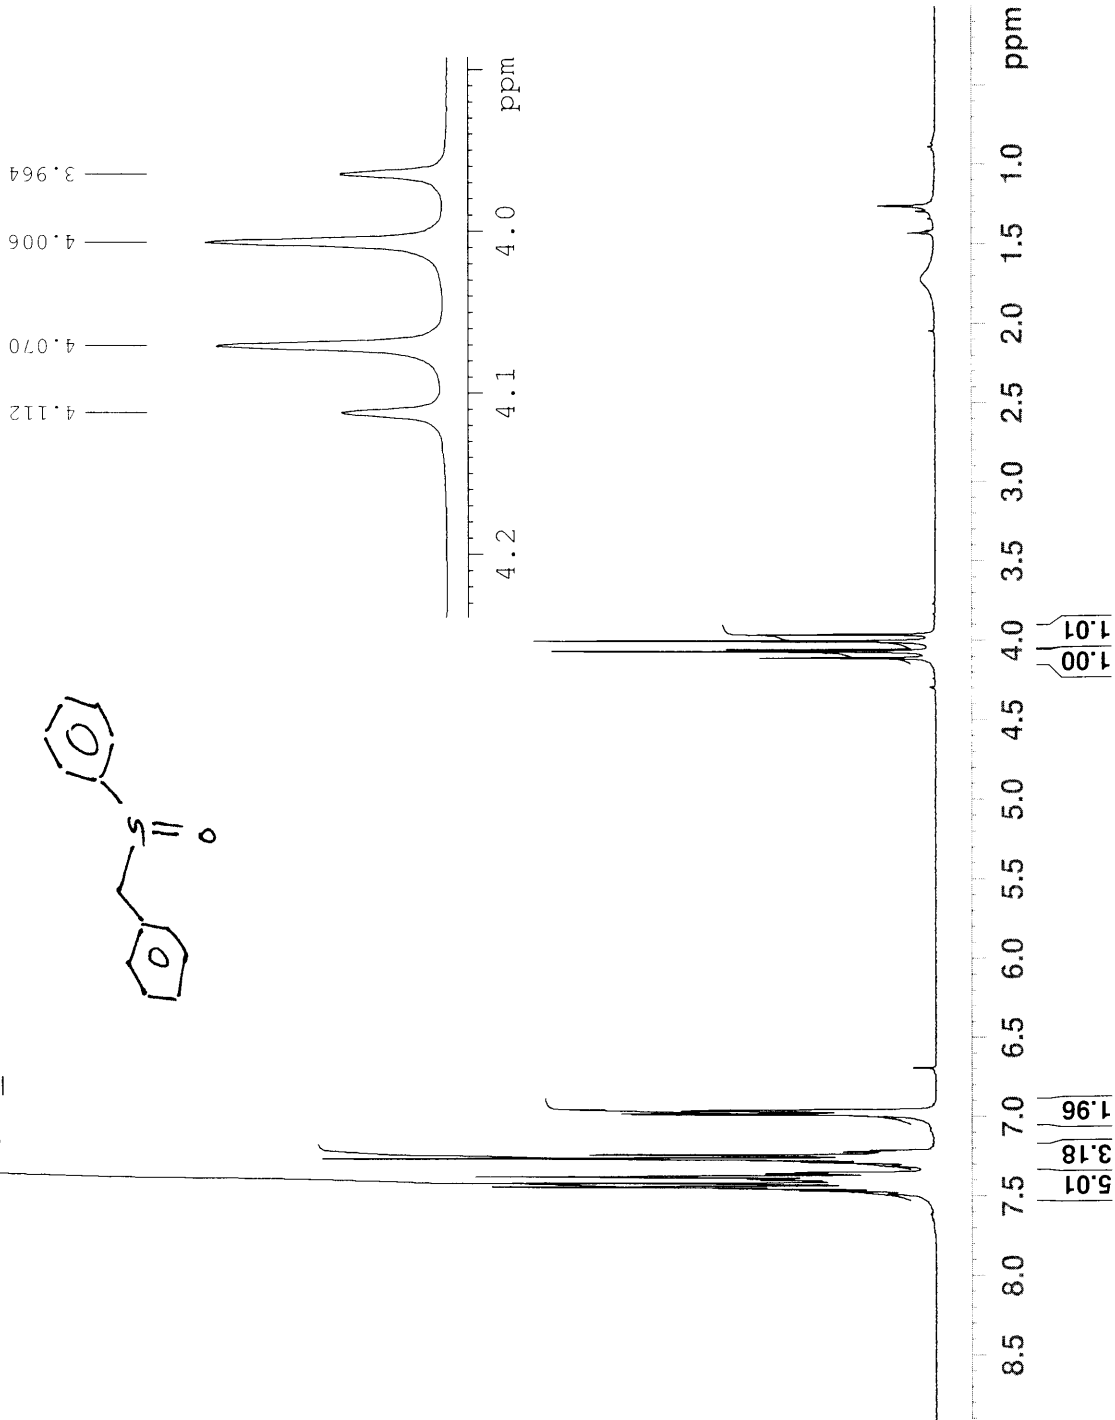

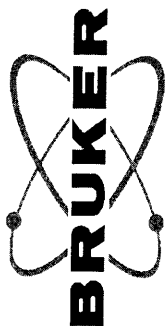

Oxi\_Bz.Ph.Sulfoxide

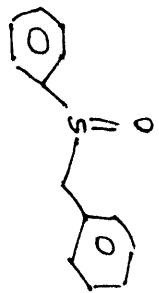

Current Data Parameters  
NAME MAK  
EXPNO 253  
PROCNO 1

F2 - Acquisition Parameters  
Date\_ 20110325  
Time 16.20  
INSTRUM spect  
PROBHD 5 mm BBO BB-1H  
PULPROG zgpg30  
TD 65536  
SOLVENT CDC13  
NS 1012  
DS 4  
SWH 18028.846 Hz  
FIDRES 0.275098 Hz  
AQ 1.8175818 sec  
RG 32800  
DW 27.733 usec  
DE 6.00 usec  
TE 300.0 K  
D1 2.0000000 sec  
d11 0.0300000 sec  
DELTA 1.89999998 sec  
TD0 1

==== CHANNEL f1 =====  
NUC1 13C  
P1 9.25 usec  
PL1 -1.00 dB  
SFO1 75.4752953 MHz

==== CHANNEL f2 =====  
CPDPRG2 waltz16  
NUC2 1H  
PCPD2 80.00 usec  
PL12 17.00 dB  
PL13 17.00 dB  
PL2 0.00 dB  
SFO2 300.1312005 MHz

F2 - Processing parameters  
SI 32768  
SF 75.4677490 MHz  
WDW EM  
SSB 0  
LB 1.00 Hz  
GB 0  
PC 1.40

143.01  
131.01  
130.32  
129.15  
128.75  
128.39  
128.18  
124.42  
99.99  
96.13  
77.35  
76.93  
76.51  
63.64

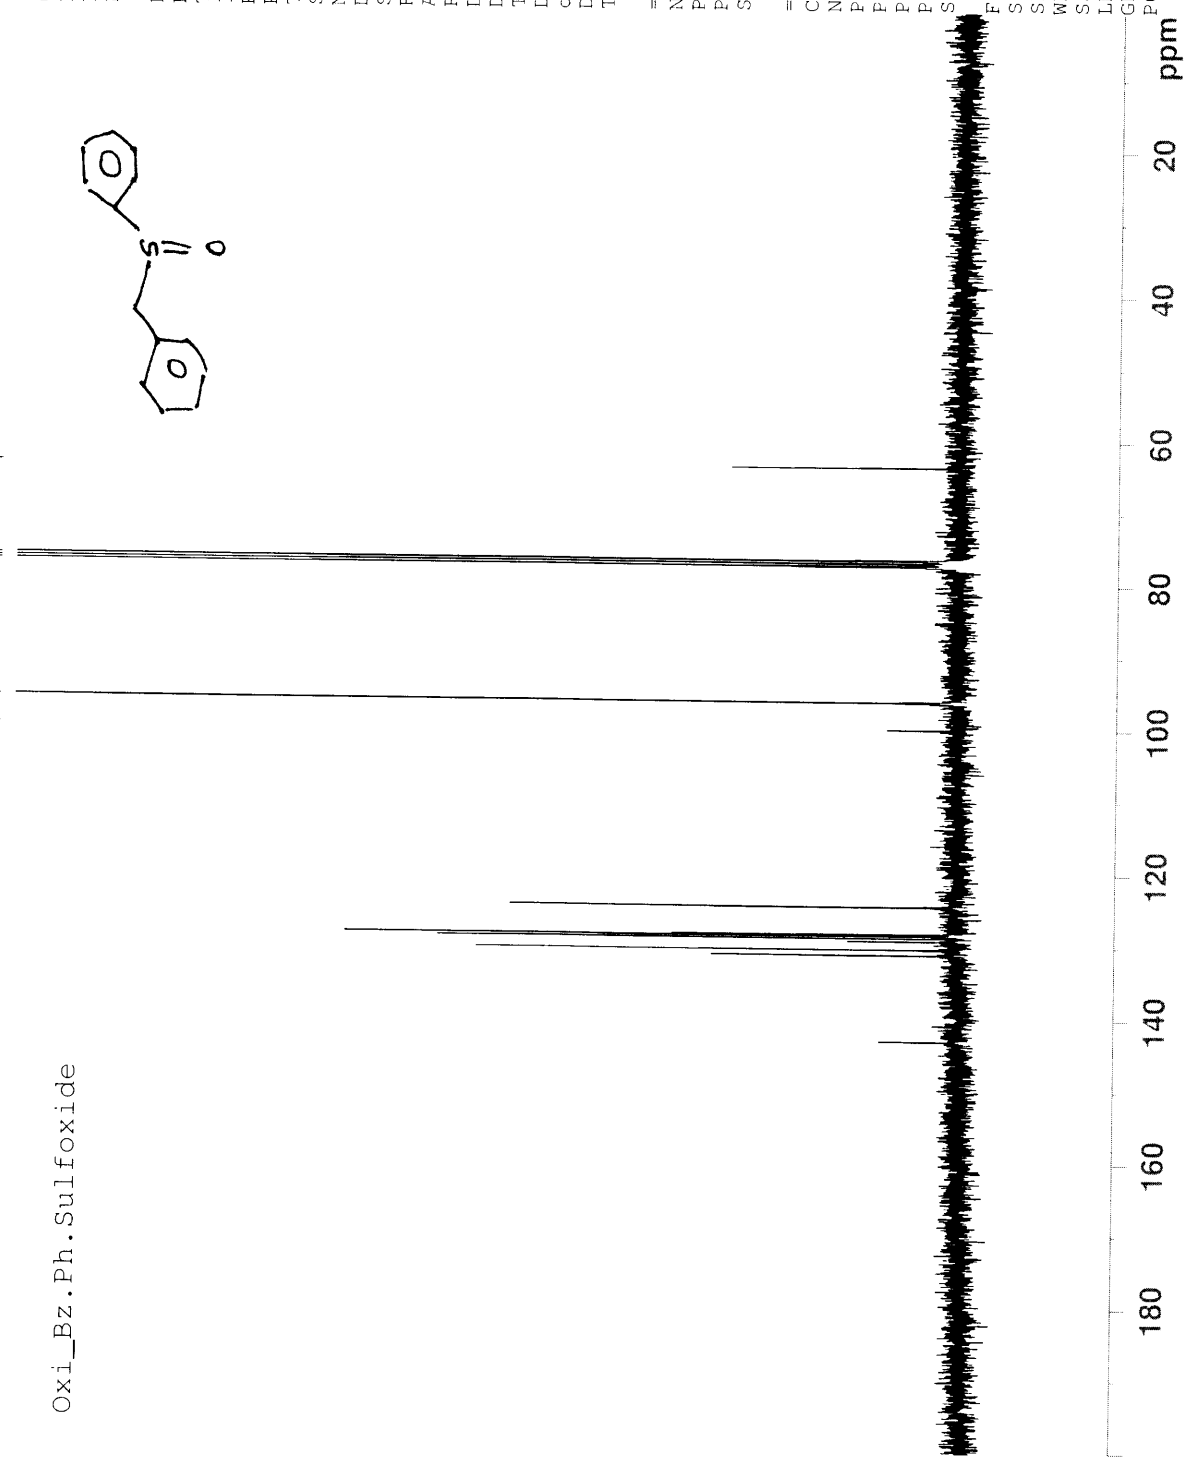

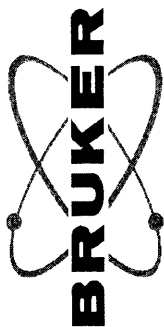

Oxi\_Bz.Ph.S/Ox-KBr\_0o C

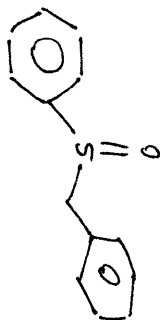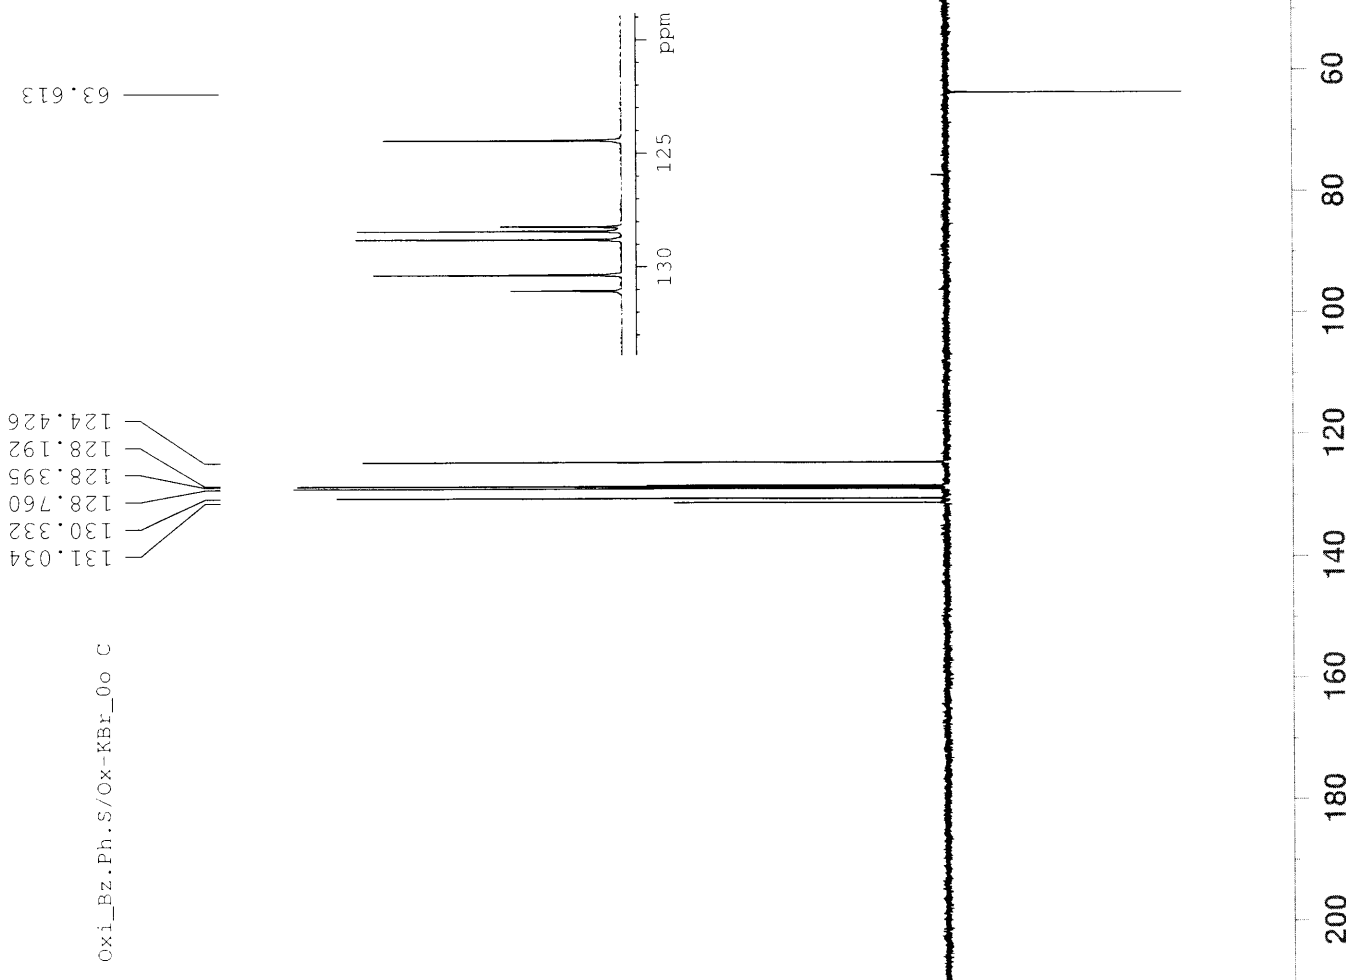

Current Data Parameters  
NAME MAK  
EXPNO 252  
PROCNO 1

F2 - Acquisition Parameters  
Date\_ 20110325  
Time 15.17  
INSTRUM spect  
PROBHD 5 mm BBO BB-1H  
PULPROG dept135  
TD 65536  
SOLVENT CDCl3  
NS 2500  
DS 8  
SWH 18115.941 Hz  
FIDRES 0.276427 Hz  
AQ 1.8088436 sec  
RG 2050  
DW 27.600 usec  
DE 6.00 usec  
TE 300.0 K  
CNST2 145.000000 sec  
D1 4.0000000 sec  
d12 0.0002000 sec  
d2 0.00344828 sec  
DELTA 0.00001178 sec  
TD0 1

==== CHANNEL f1 =====  
NUC1 13C  
P1 9.25 usec  
P2 18.50 usec  
PL1 -1.00 dB  
SFO1 75.4745411 MHz

==== CHANNEL f2 =====  
CPDPRG2 waltz16  
NUC2 1H  
P3 11.00 usec  
P4 22.00 usec  
PCPD2 80.00 usec  
PL12 17.00 dB  
PL2 0.00 dB  
SFO2 300.1315007 MHz

F2 - Processing parameters  
SI 32768  
SF 75.4677490 MHz  
WDW EM  
SSB 0  
LB 1.00 Hz  
GB 0  
PC 1.40
